# Supplementary material
Source: Copernicus journal article supplement (doi:10.5194/essd-18-3559-2026)
Supplement: Supplementary file 1 [file essd-18-3559-2026-supplement.pdf]

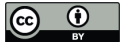

*Supplement of*

**A dataset of vertical profiles of O<sub>3</sub> and HONO from the hyperspectral vertical remote sensing network in China (2021–2024)**

**Tiliang Zou et al.**

*Correspondence to:* Chengzhi Xing ([xingcz@aiofm.ac.cn](mailto:xingcz@aiofm.ac.cn)) and Cheng Liu ([chliu81@ustc.edu.cn](mailto:chliu81@ustc.edu.cn))

The copyright of individual parts of the supplement might differ from the article licence.

Table S1. Locations of all sites and their nearest CNEMCs stations.

| No. | MAX-DOAS stations |               |              | The nearest CNEMCs |               |              | Distance (km) |
|-----|-------------------|---------------|--------------|--------------------|---------------|--------------|---------------|
|     | Station(code)     | Longitude(°E) | Latitude(°N) | Station(code)      | Longitude(°E) | Latitude(°N) |               |
| 1   | CAMS1             | 116.32        | 39.94        | 1006A              | 116.34        | 39.93        | 2.01          |
| 2   | CAMS2             | 116.32        | 39.94        | 1006A              | 116.34        | 39.93        | 2.01          |
| 3   | UCAS              | 116.67        | 40.4         | 1009A              | 116.63        | 40.33        | 8.83          |
| 4   | WD                | 115.15        | 38.17        | 3573A              | 114.85        | 38.03        | 30.34         |
| 5   | SJZ LC            | 114.61        | 37.91        | 3572A              | 114.64        | 37.90        | 3.01          |
| 6   | SXU               | 112.58        | 37.63        | 1085A              | 112.56        | 37.74        | 12.31         |
| 7   | TS                | 117.1         | 36.25        | 1657A              | 117.09        | 36.20        | 5.47          |
| 8   | NUIST             | 118.71        | 32.2         | 1157A              | 118.64        | 32.09        | 13.53         |
| 9   | LA                | 119.75        | 30.3         | 3558A              | 119.72        | 30.24        | 7.67          |
| 10  | HNU               | 116.8         | 33.98        | 2282A              | 116.80        | 33.98        | 0.56          |
| 11  | AHU               | 117.18        | 31.77        | 1270A              | 117.20        | 31.78        | 2.23          |
| 12  | CF                | 117.18        | 32.21        | 1275A              | 117.27        | 31.94        | 30.71         |
| 13  | GIG               | 113.35        | 23.15        | 2846A              | 113.32        | 23.13        | 3.47          |
| 14  | SUST              | 113.99        | 22.59        | 3306A              | 114.03        | 22.62        | 4.97          |
| 15  | CDAES             | 104.04        | 30.65        | 1437A              | 104.04        | 30.66        | 0.69          |
| 16  | CQ                | 106.5         | 29.6         | 3133A              | 106.55        | 29.57        | 5.94          |
| 17  | GZ ZL             | 113.34        | 23.36        | 3299A              | 113.35        | 23.37        | 1.26          |
| 18  | GZ NS             | 113.61        | 22.77        | 3304A              | 113.53        | 22.79        | 8.07          |
| 19  | GZ TM             | 113.29        | 23.55        | 3443A              | 113.29        | 23.55        | 0.49          |
| 20  | GZ GY             | 113.26        | 23.13        | 1352A              | 113.26        | 23.13        | 0.35          |
| 21  | GZ DXC            | 113.39        | 23.04        | 3302A              | 113.39        | 23.05        | 1.02          |
| 22  | LY                | 112.45        | 34.67        | 3636A              | 112.44        | 34.68        | 1.36          |

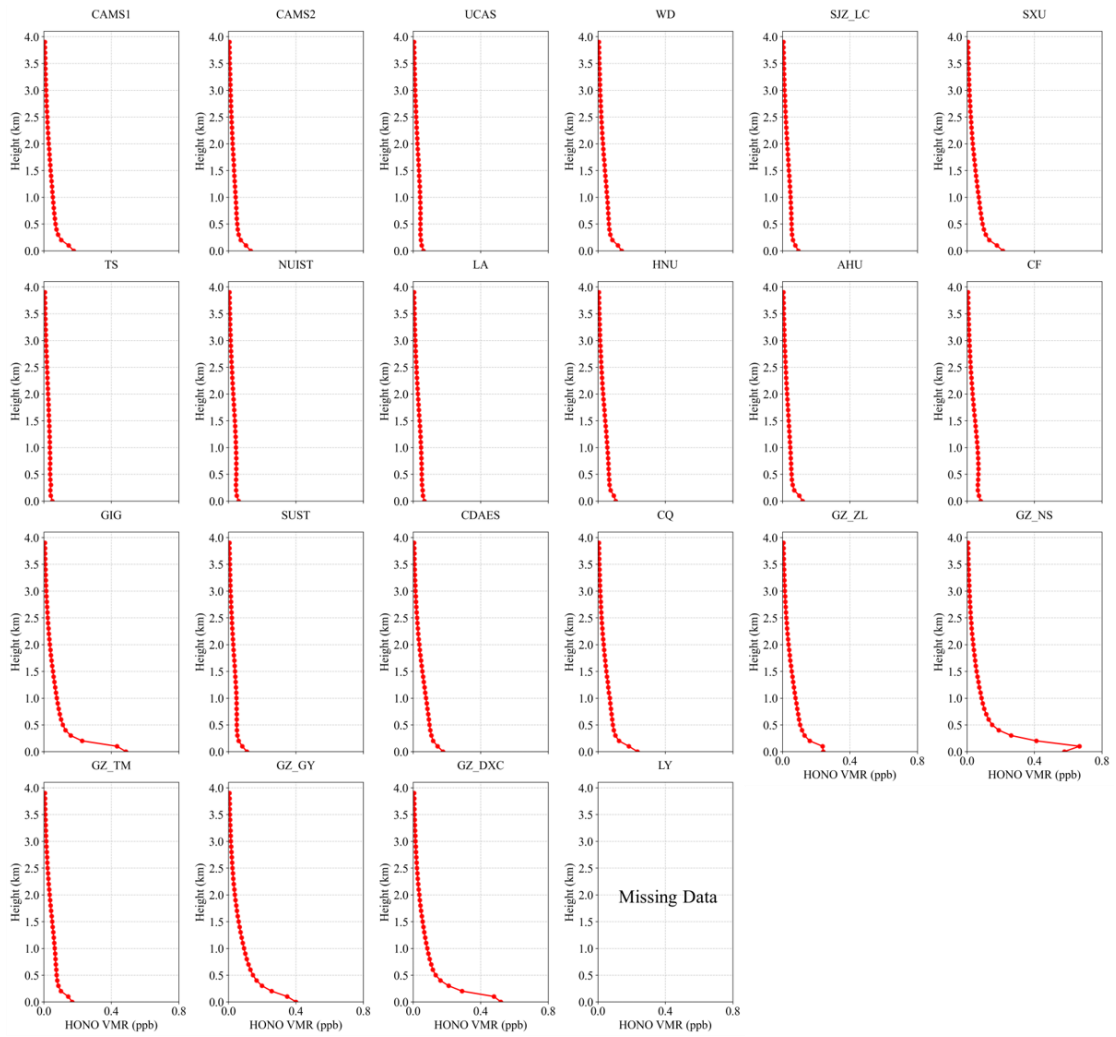

Figure S1. Seasonal-mean vertical profiles of HONO in spring (2021–2024).

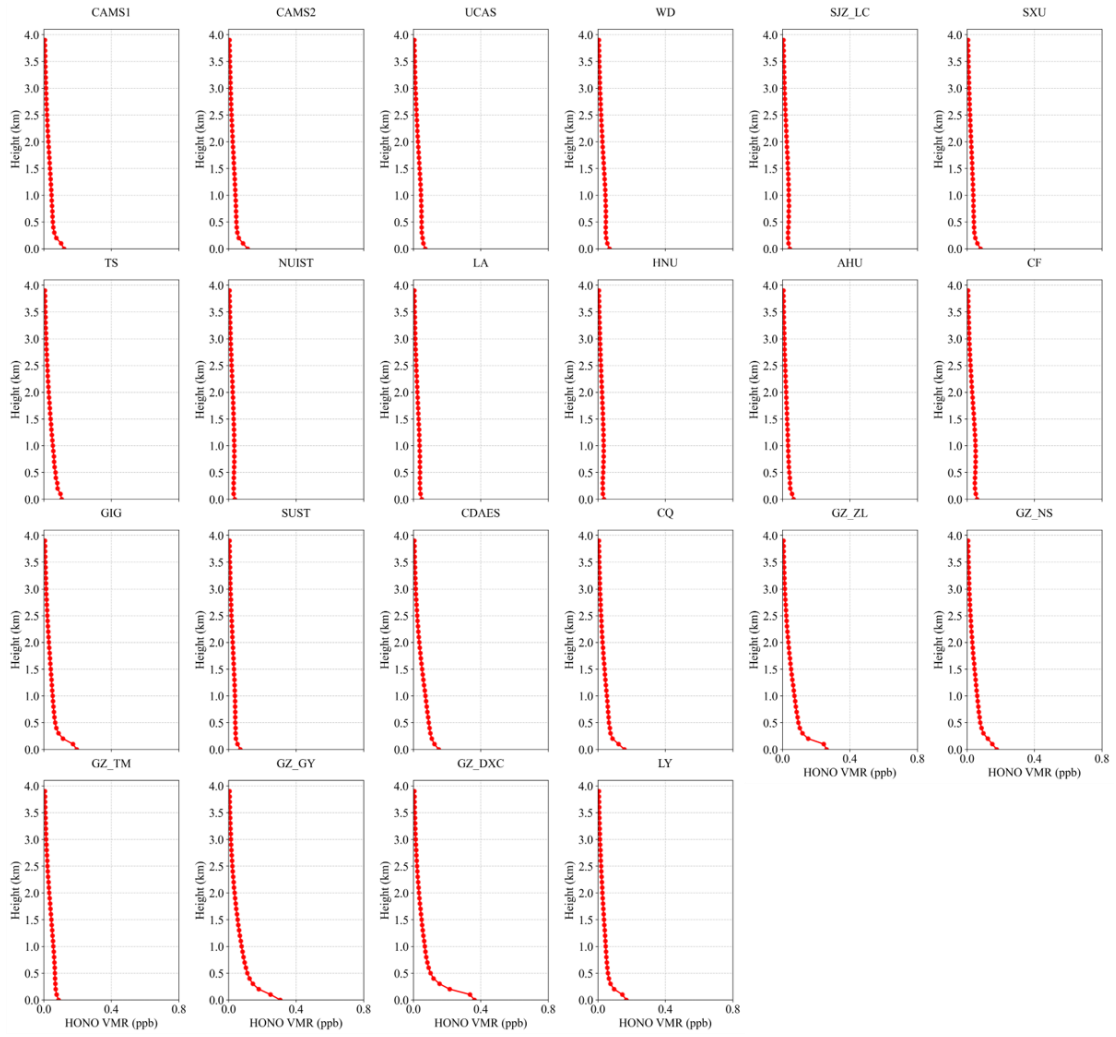

Figure S2. Seasonal-mean vertical profiles of HONO in summer (2021–2024).

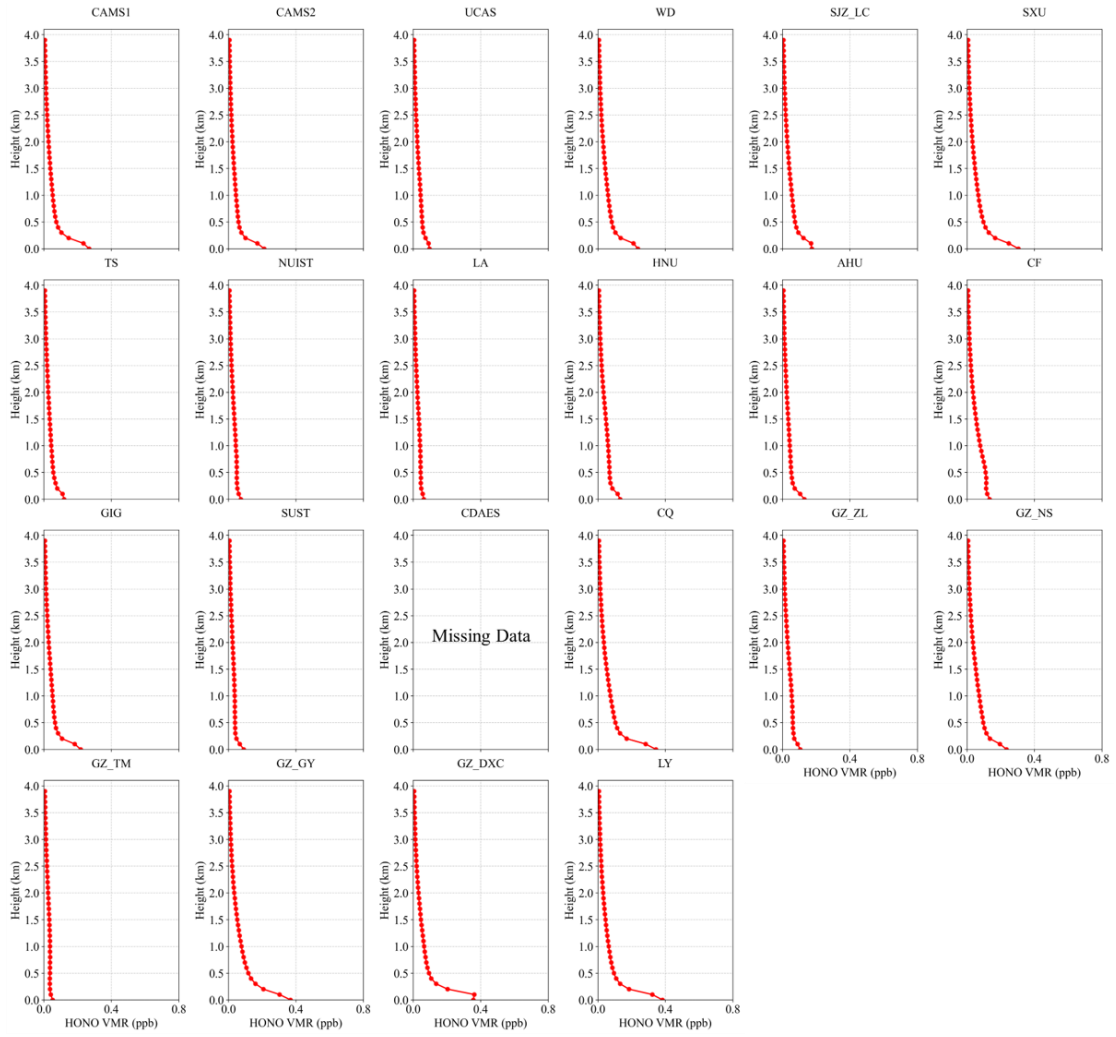

Figure S3. Seasonal-mean vertical profiles of HONO in autumn (2021–2024).

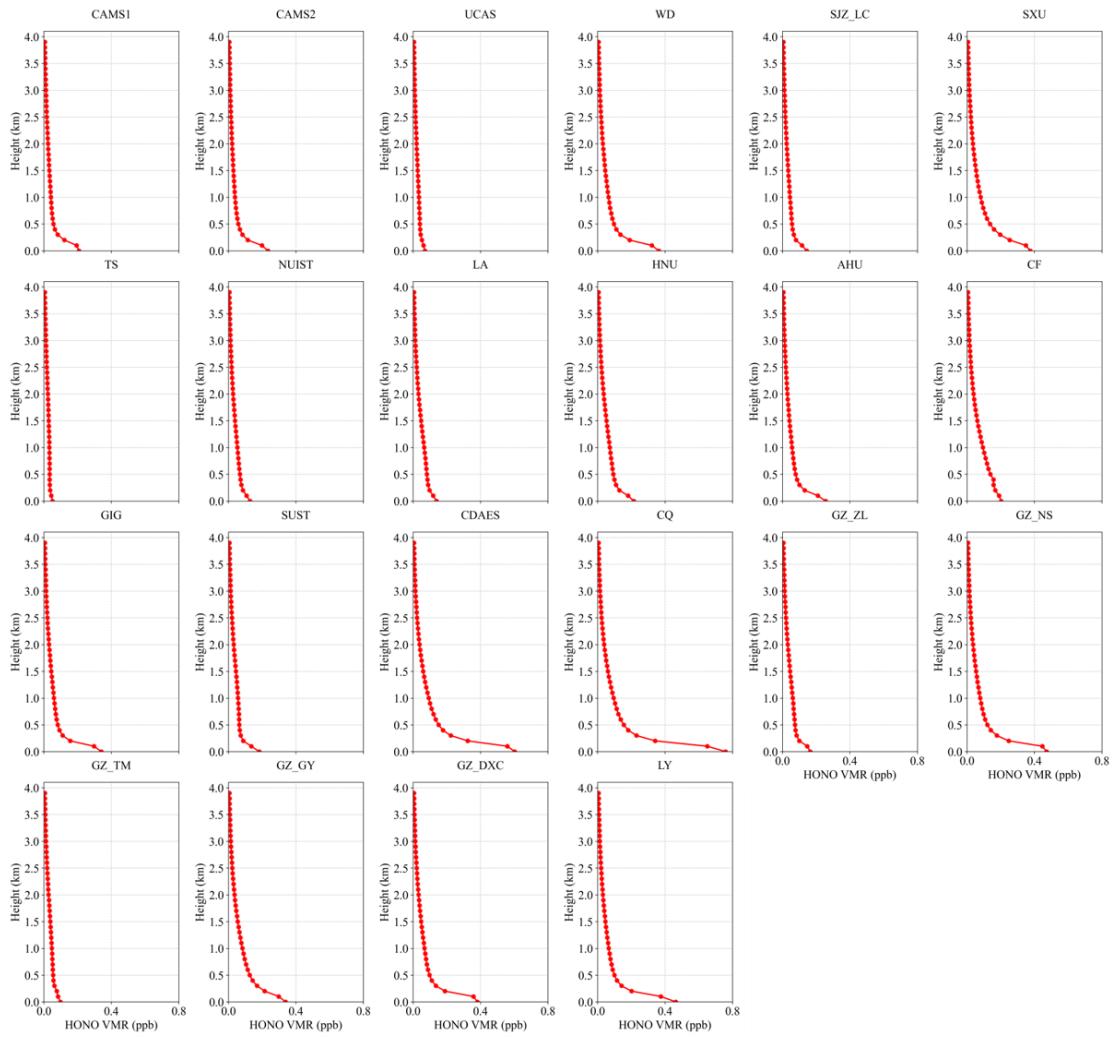

Figure S4. Seasonal-mean vertical profiles of HONO in winter (2021–2024).

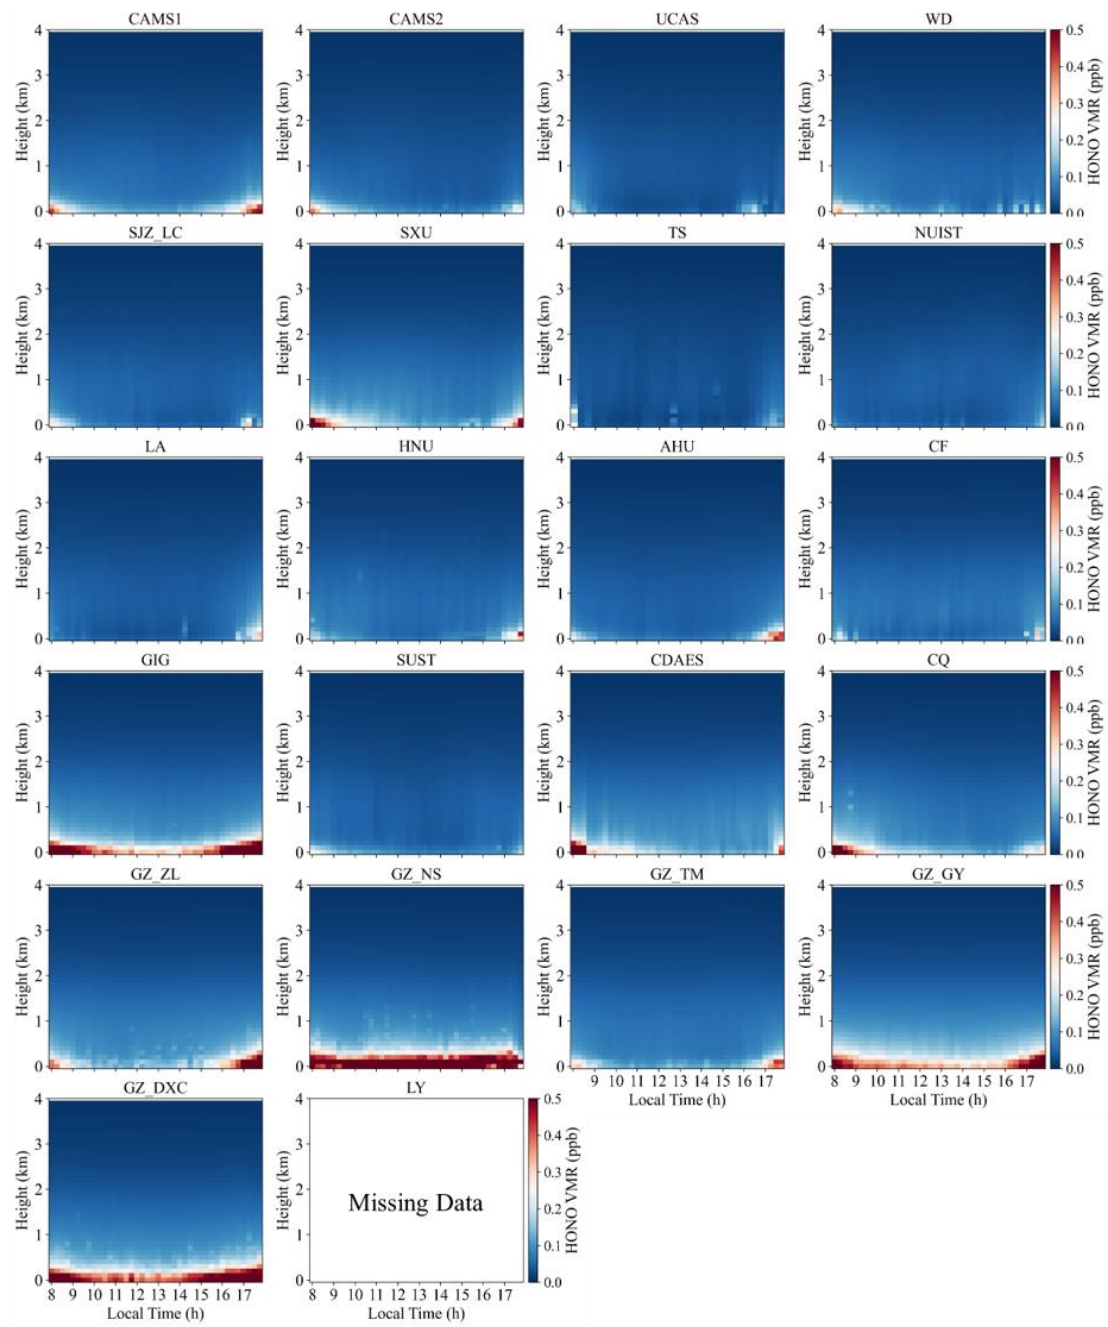

Figure S5. Mean diurnal evolution of the springtime HONO vertical profiles (2021–2024).

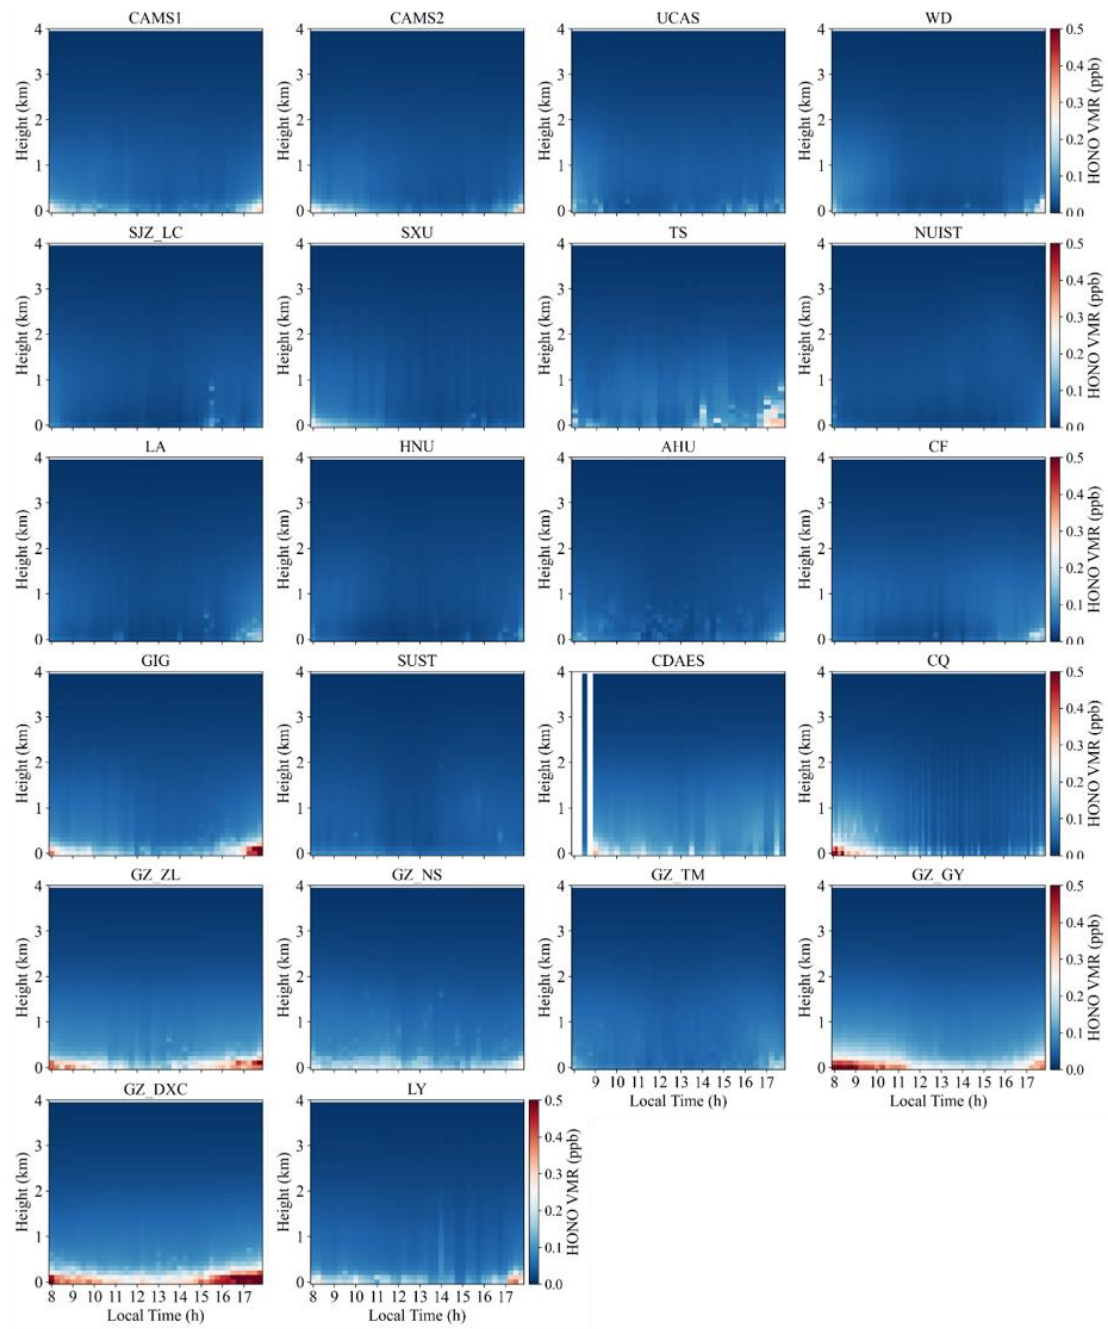

Figure S6. Mean diurnal evolution of the summertime HONO vertical profiles (2021–2024).

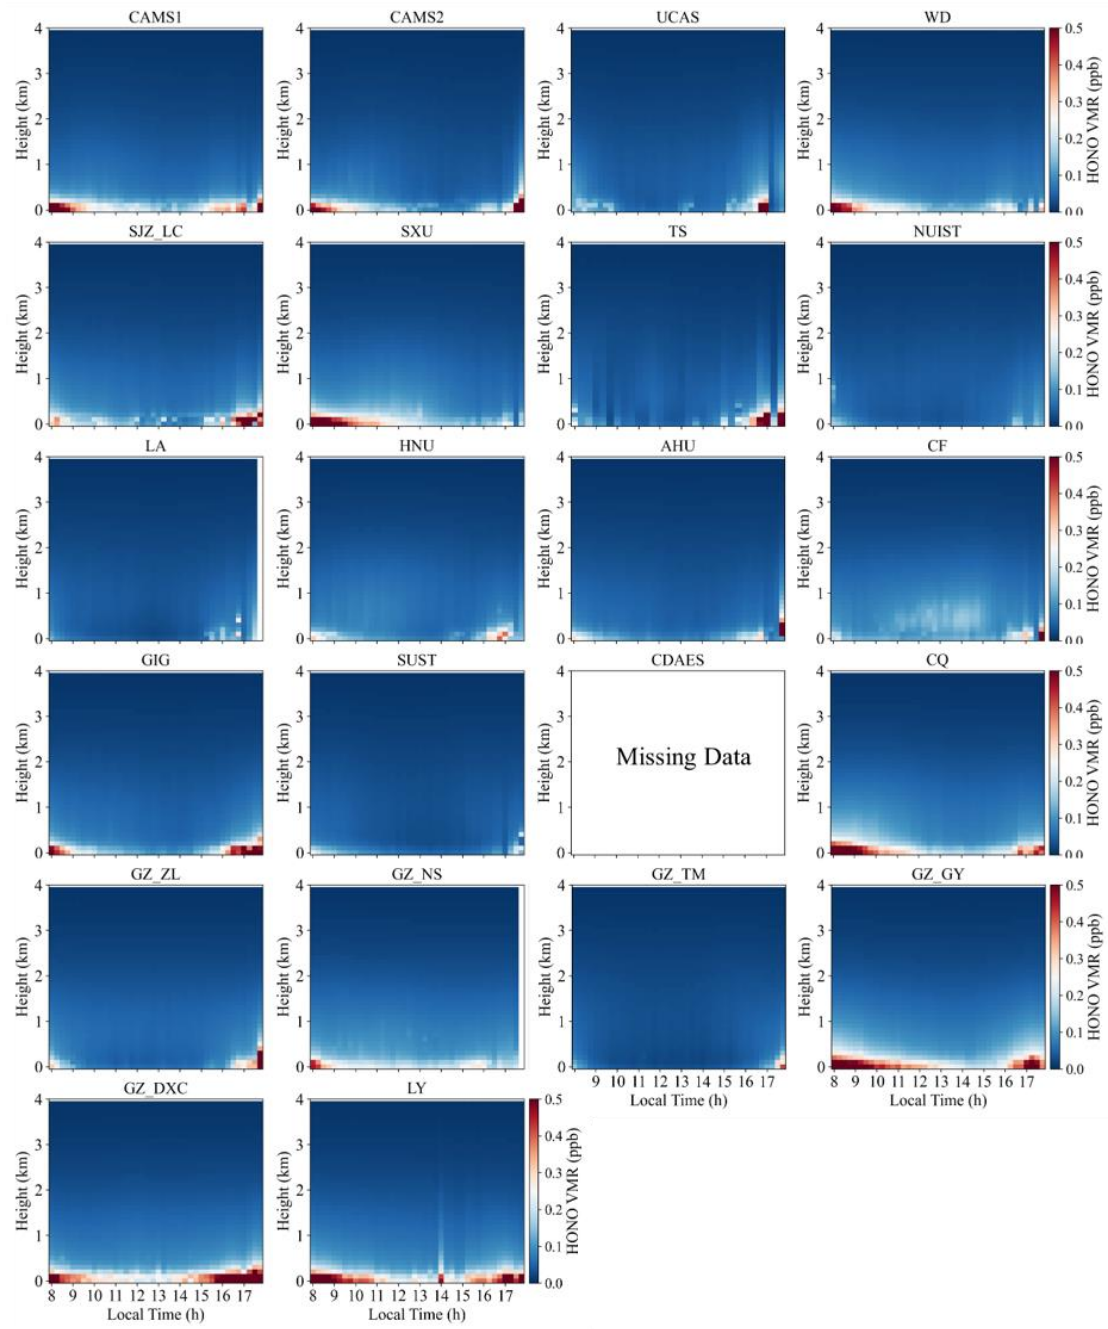

Figure S7. Mean diurnal evolution of the autumnal HONO vertical profiles (2021–2024).

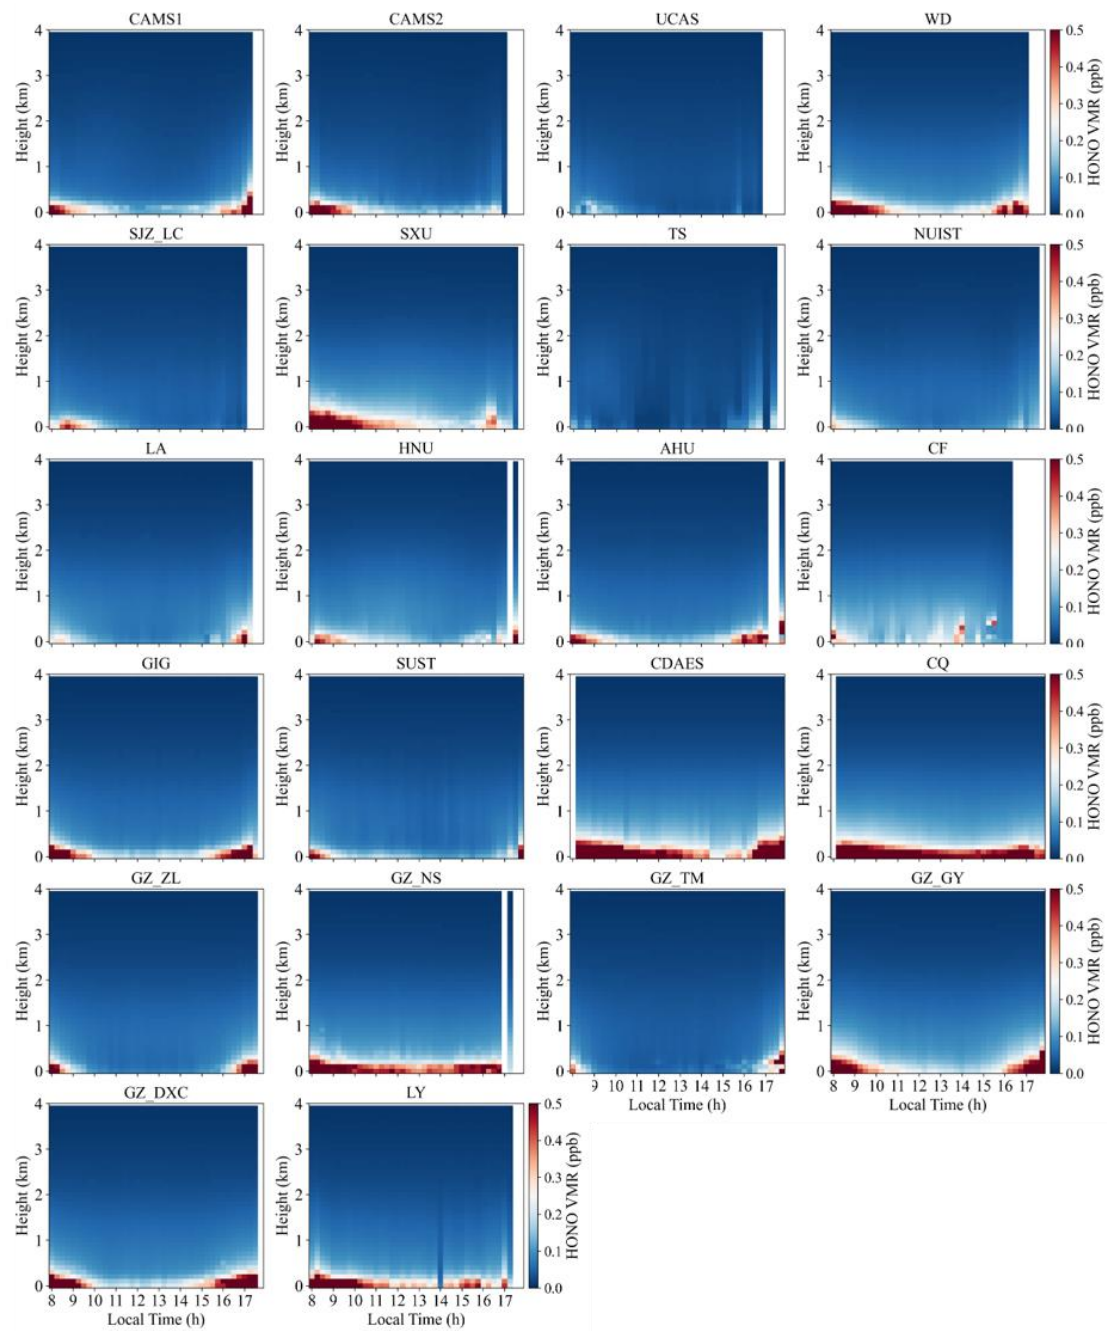

Figure S8. Mean diurnal evolution of the wintertime HONO vertical profiles (2021–2024).

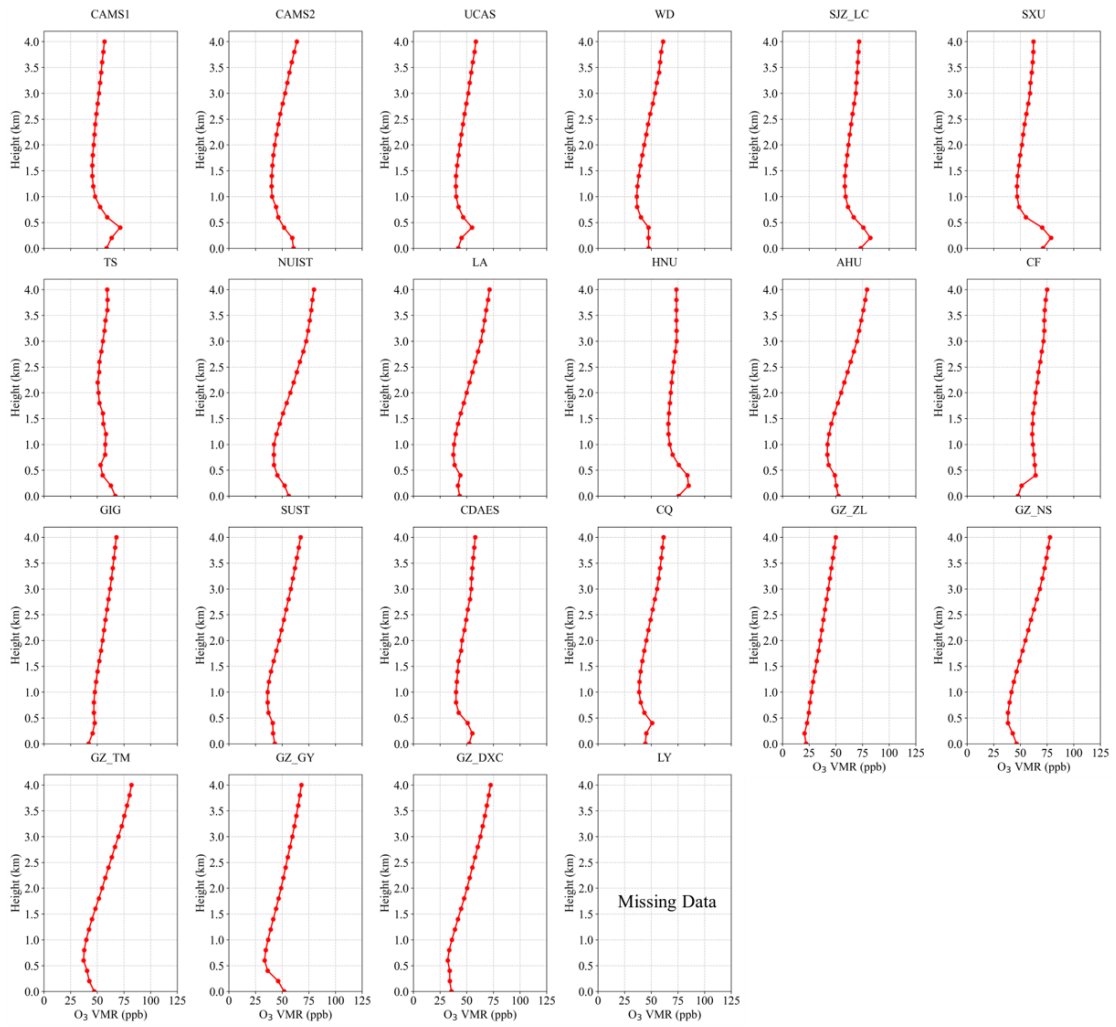

Figure S9. Seasonal-mean vertical profiles of O<sub>3</sub> in spring (2021–2024).

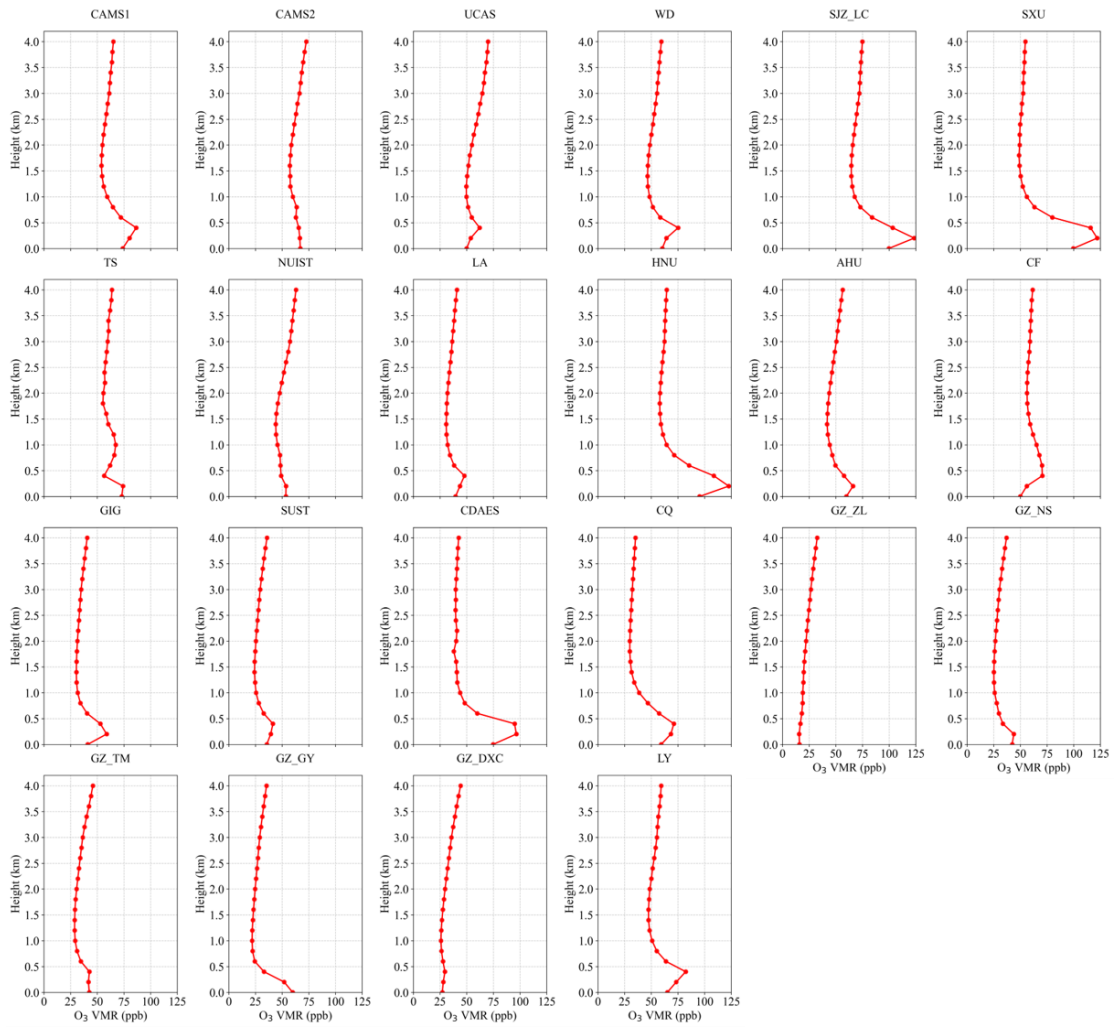

Figure S10. Seasonal-mean vertical profiles of O<sub>3</sub> in summer (2021–2024).

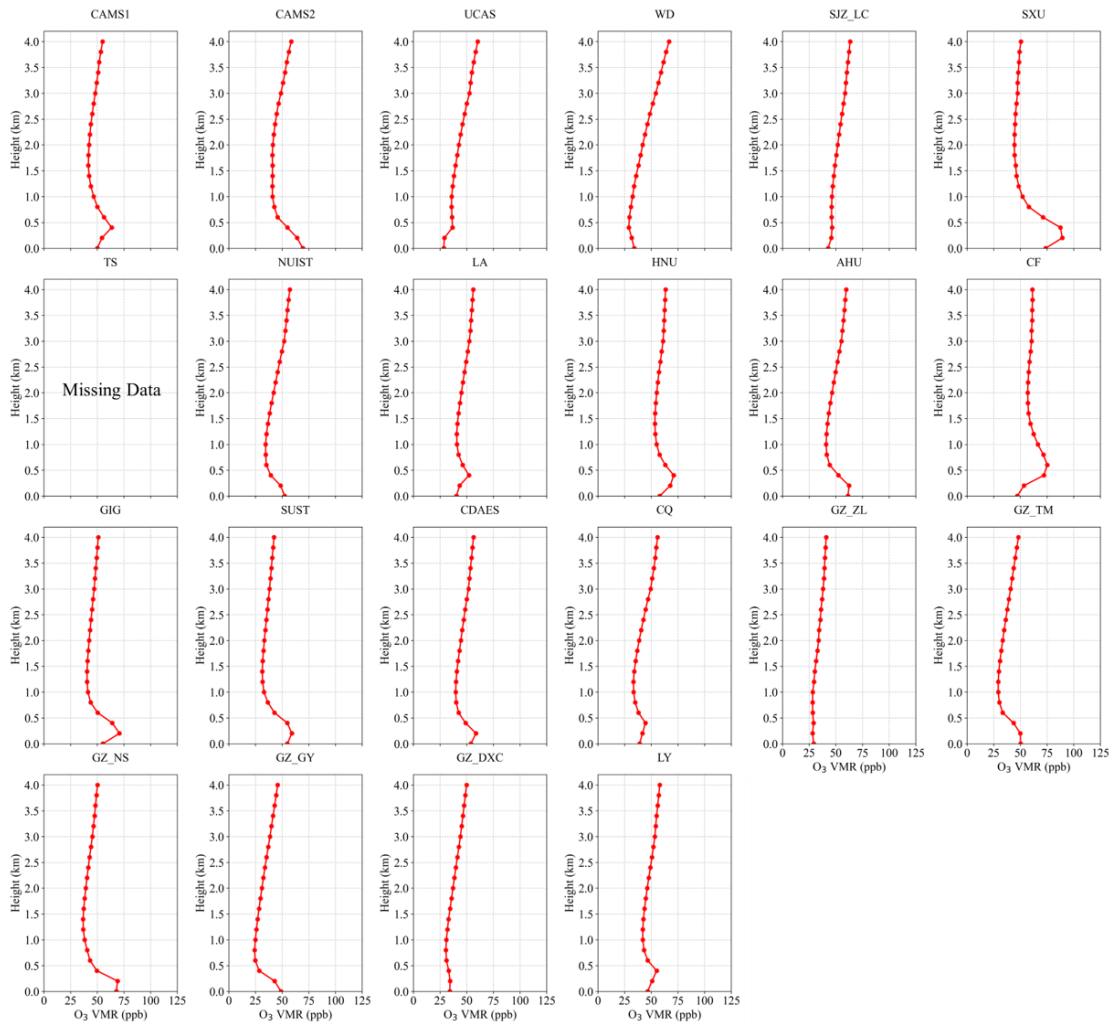

Figure S11. Seasonal-mean vertical profiles of O<sub>3</sub> in autumn (2021–2024).

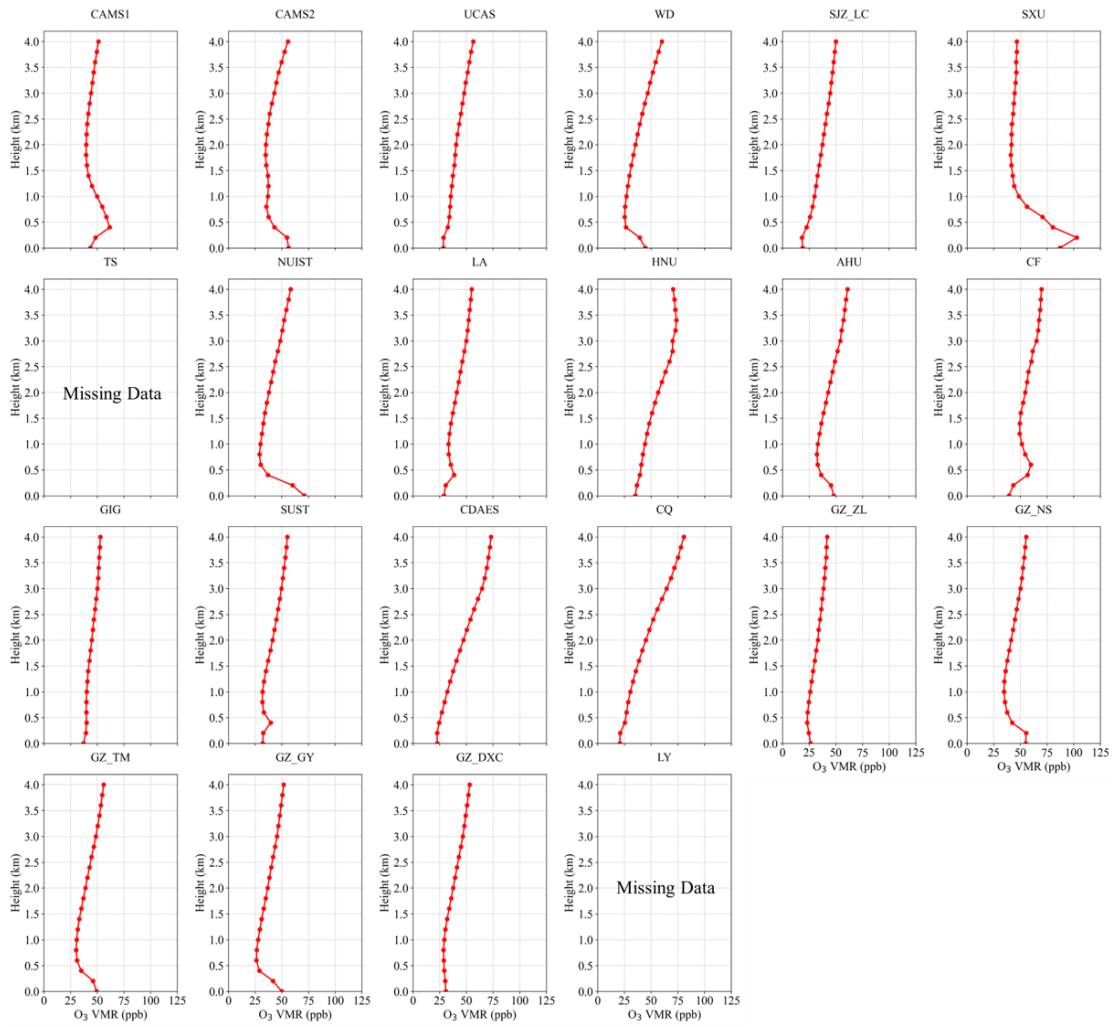

Figure S12. Seasonal-mean vertical profiles of O<sub>3</sub> in winter (2021–2024).

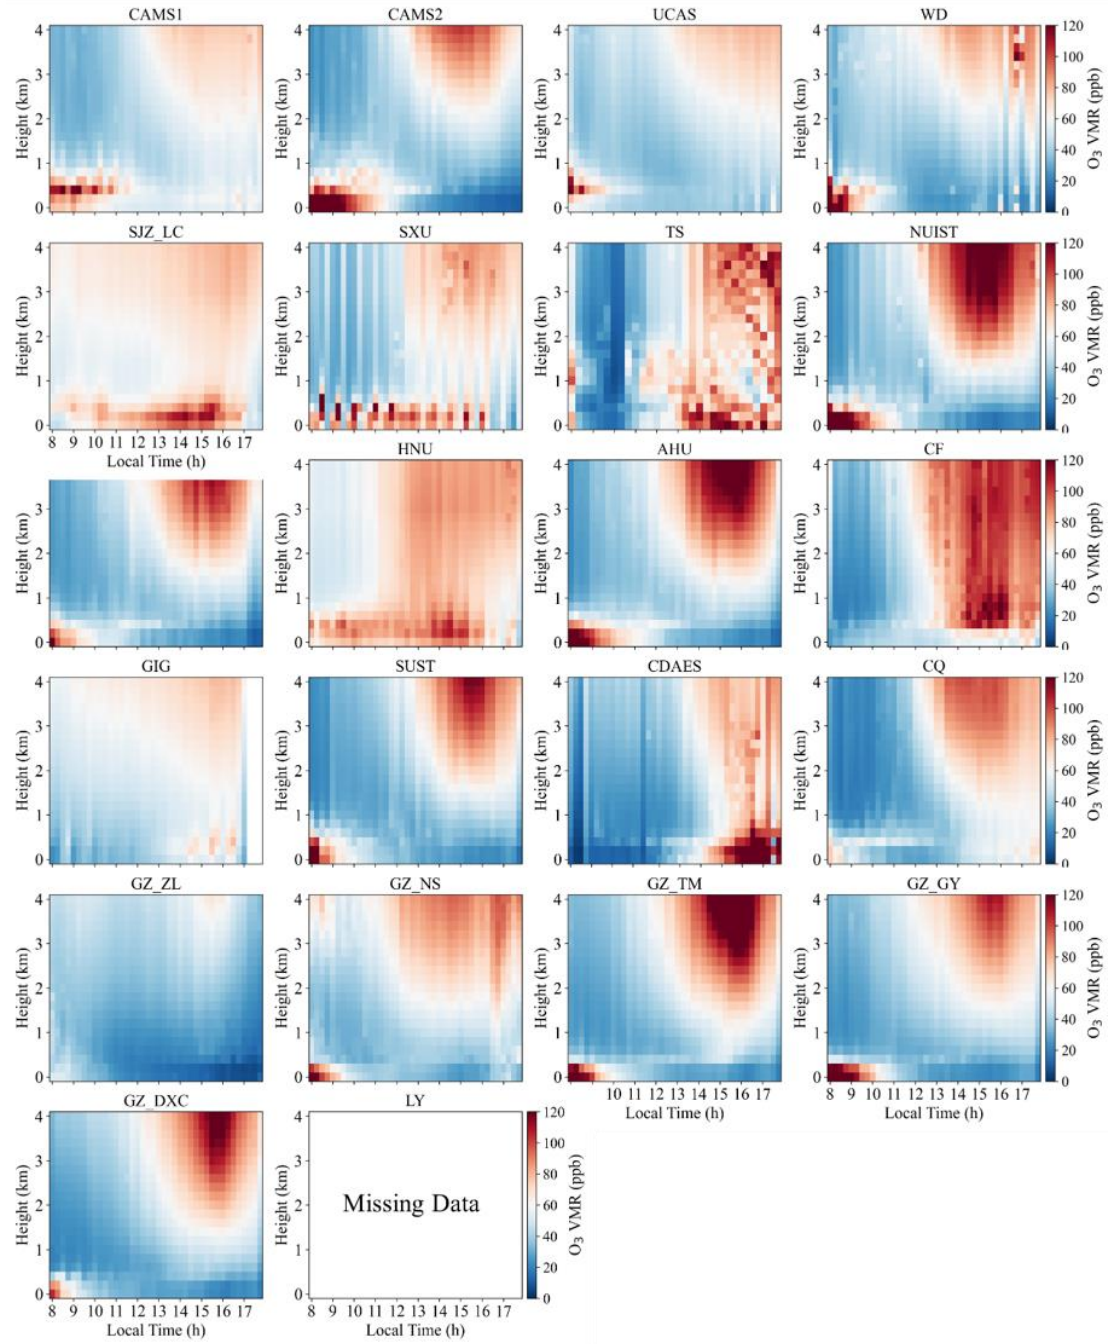

Figure S13. Mean diurnal evolution of the springtime O<sub>3</sub> vertical profiles (2021–2024).

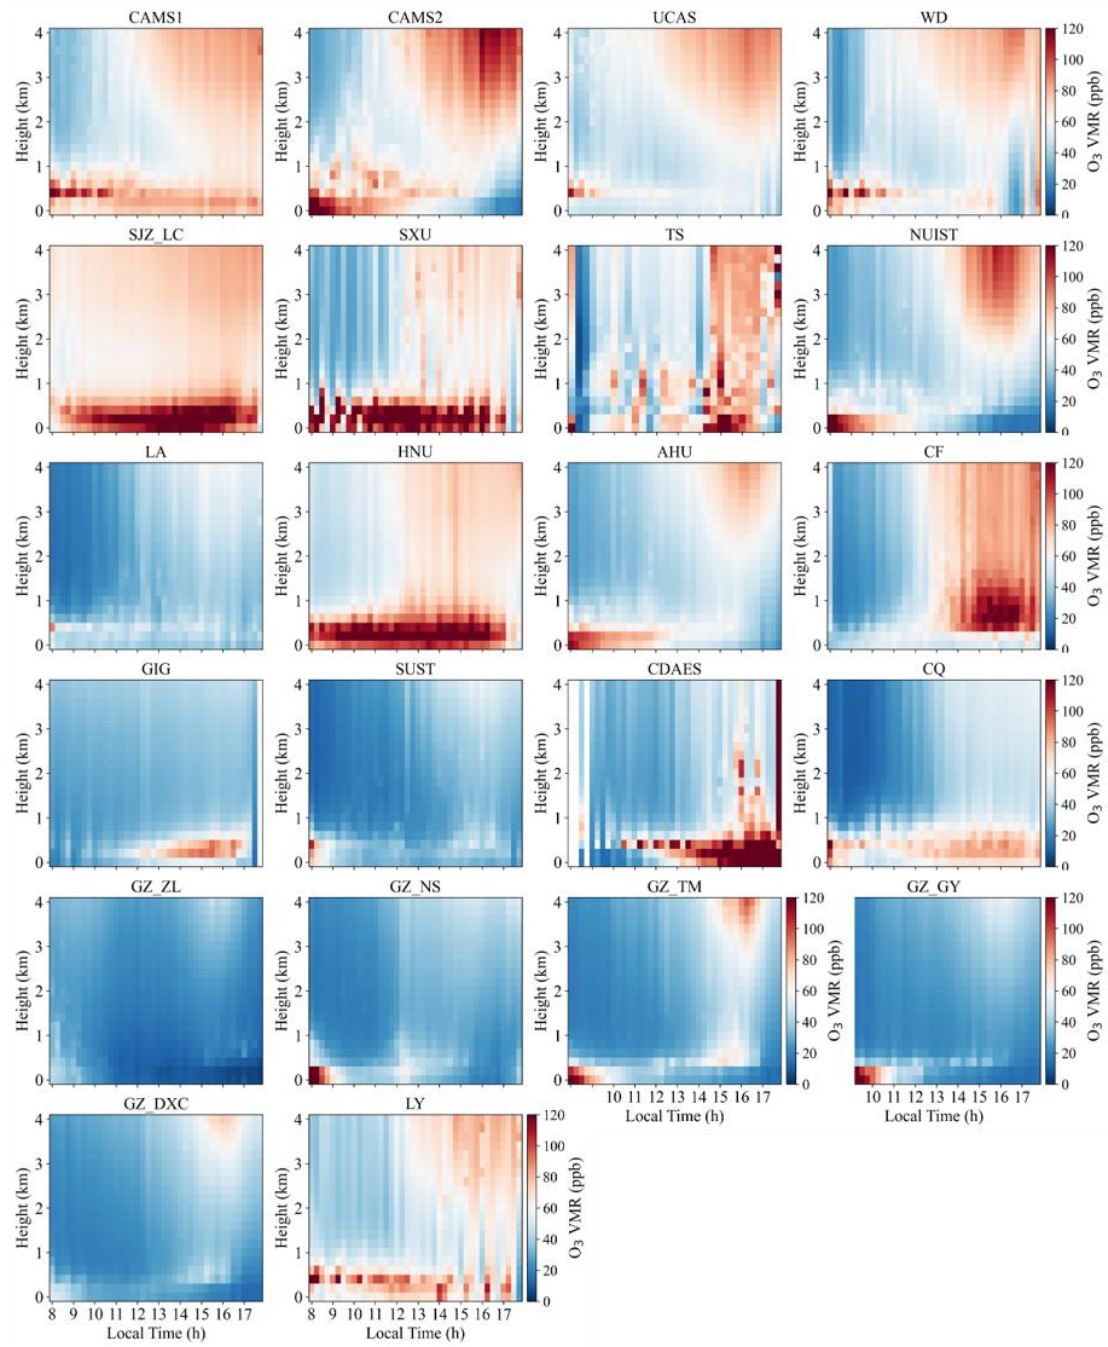

Figure S14. Mean diurnal evolution of the summertime  $O_3$  vertical profiles (2021–2024).

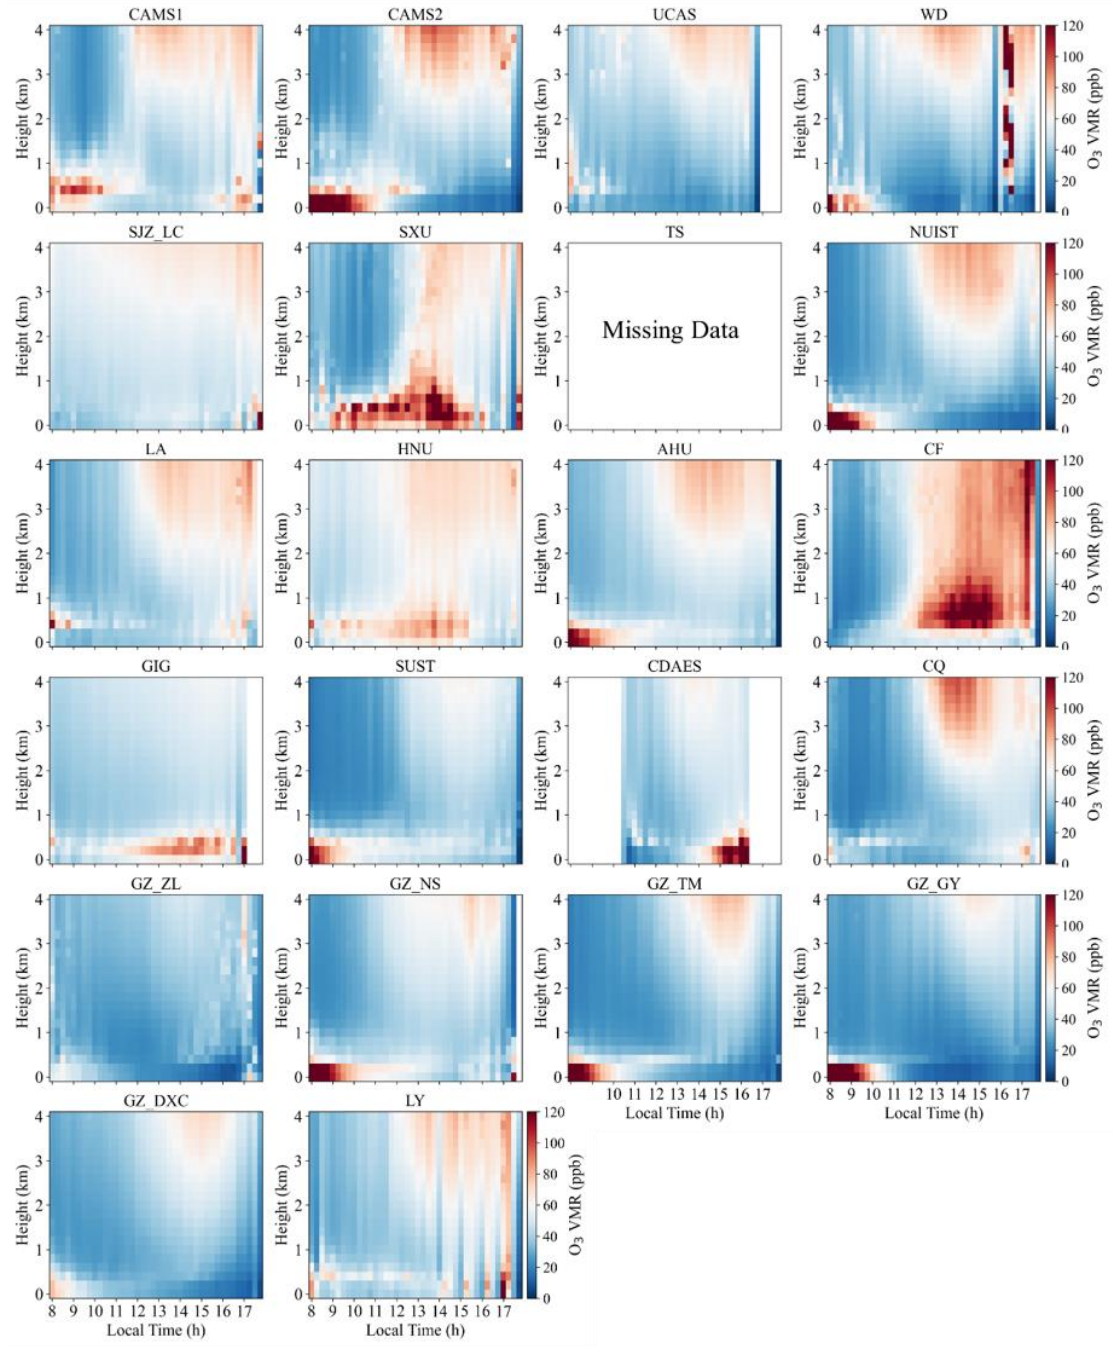

Figure S15. Mean diurnal evolution of the autumnal O<sub>3</sub> vertical profiles (2021–2024).

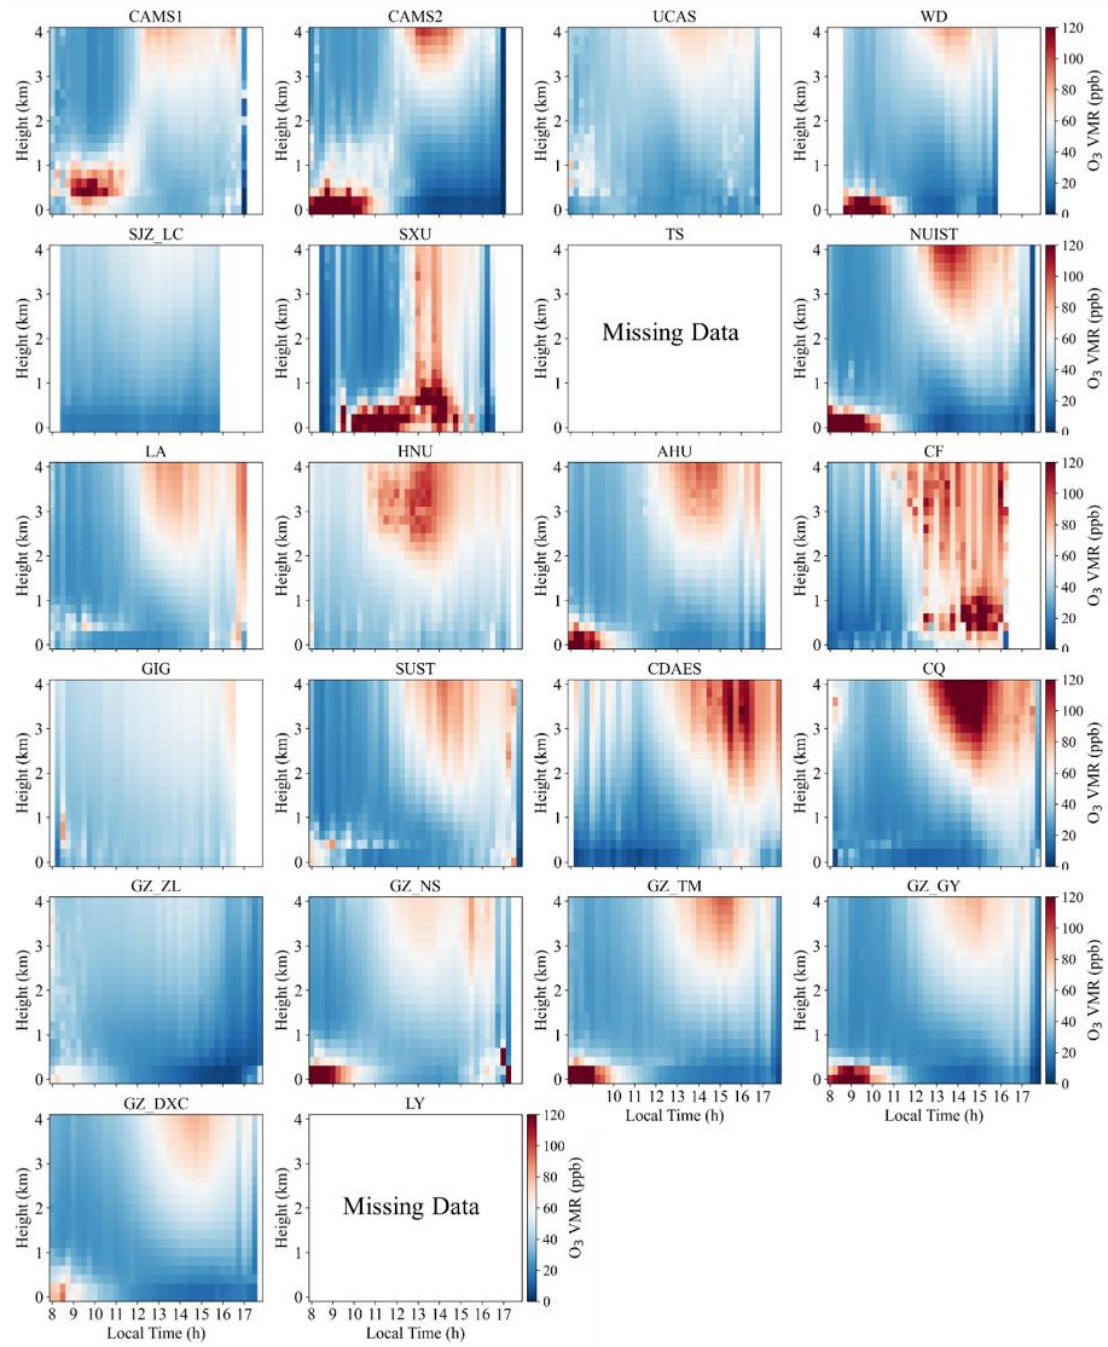

Figure S16. Mean diurnal evolution of the wintertime O<sub>3</sub> vertical profiles (2021–2024).

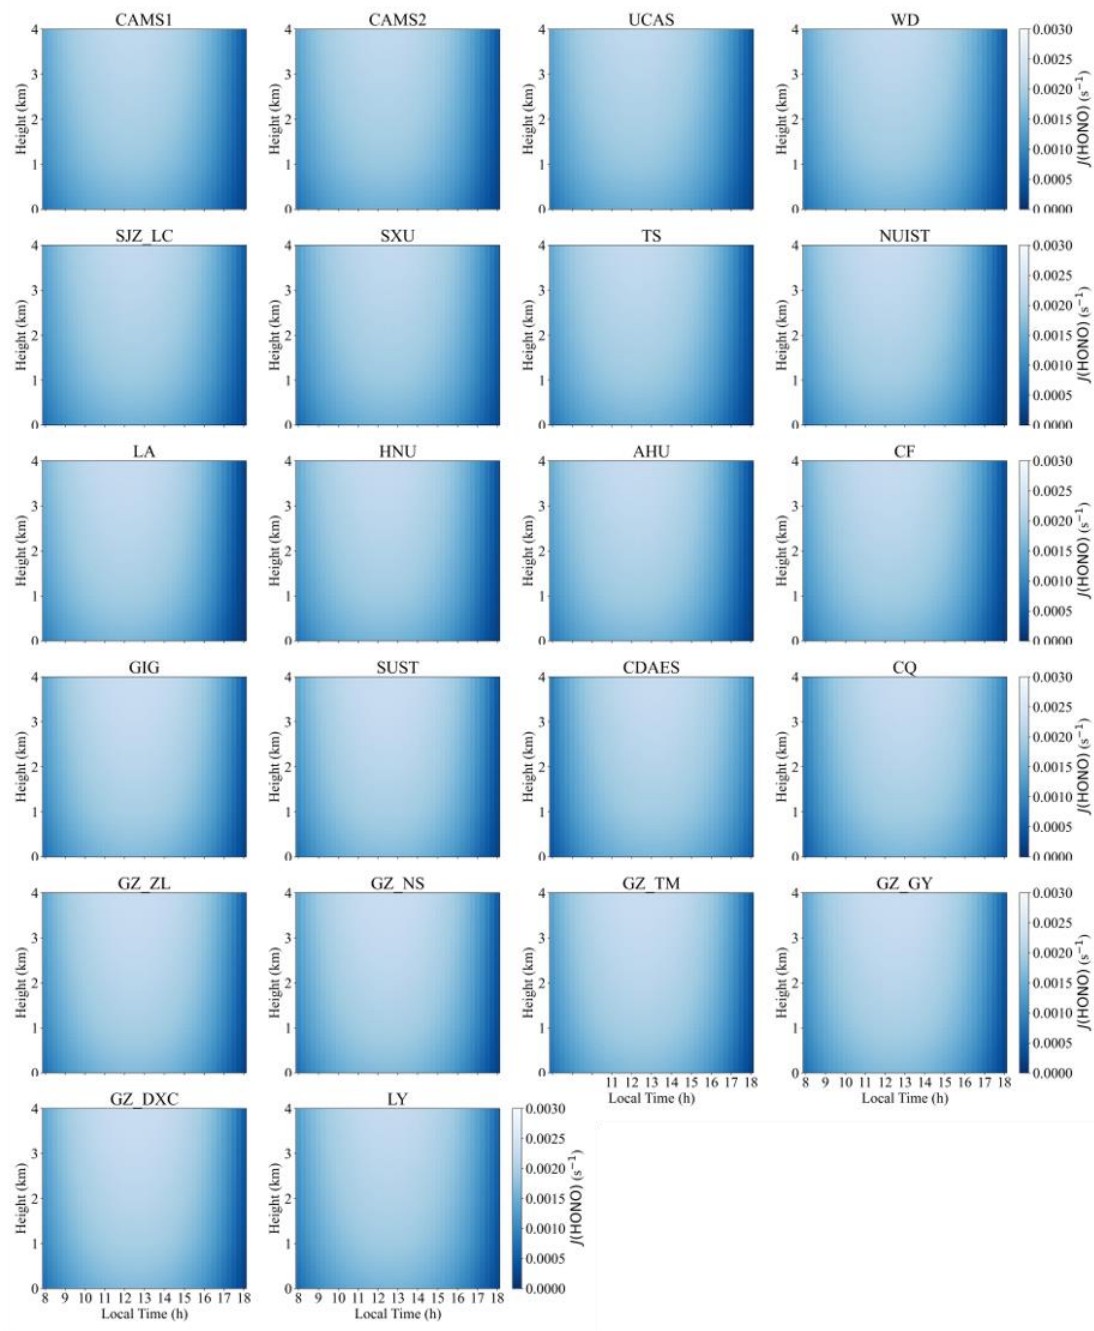

Figure S17. Spring-mean diurnal vertical profiles of the HONO photolysis frequency,  $J(\text{HONO})$ .

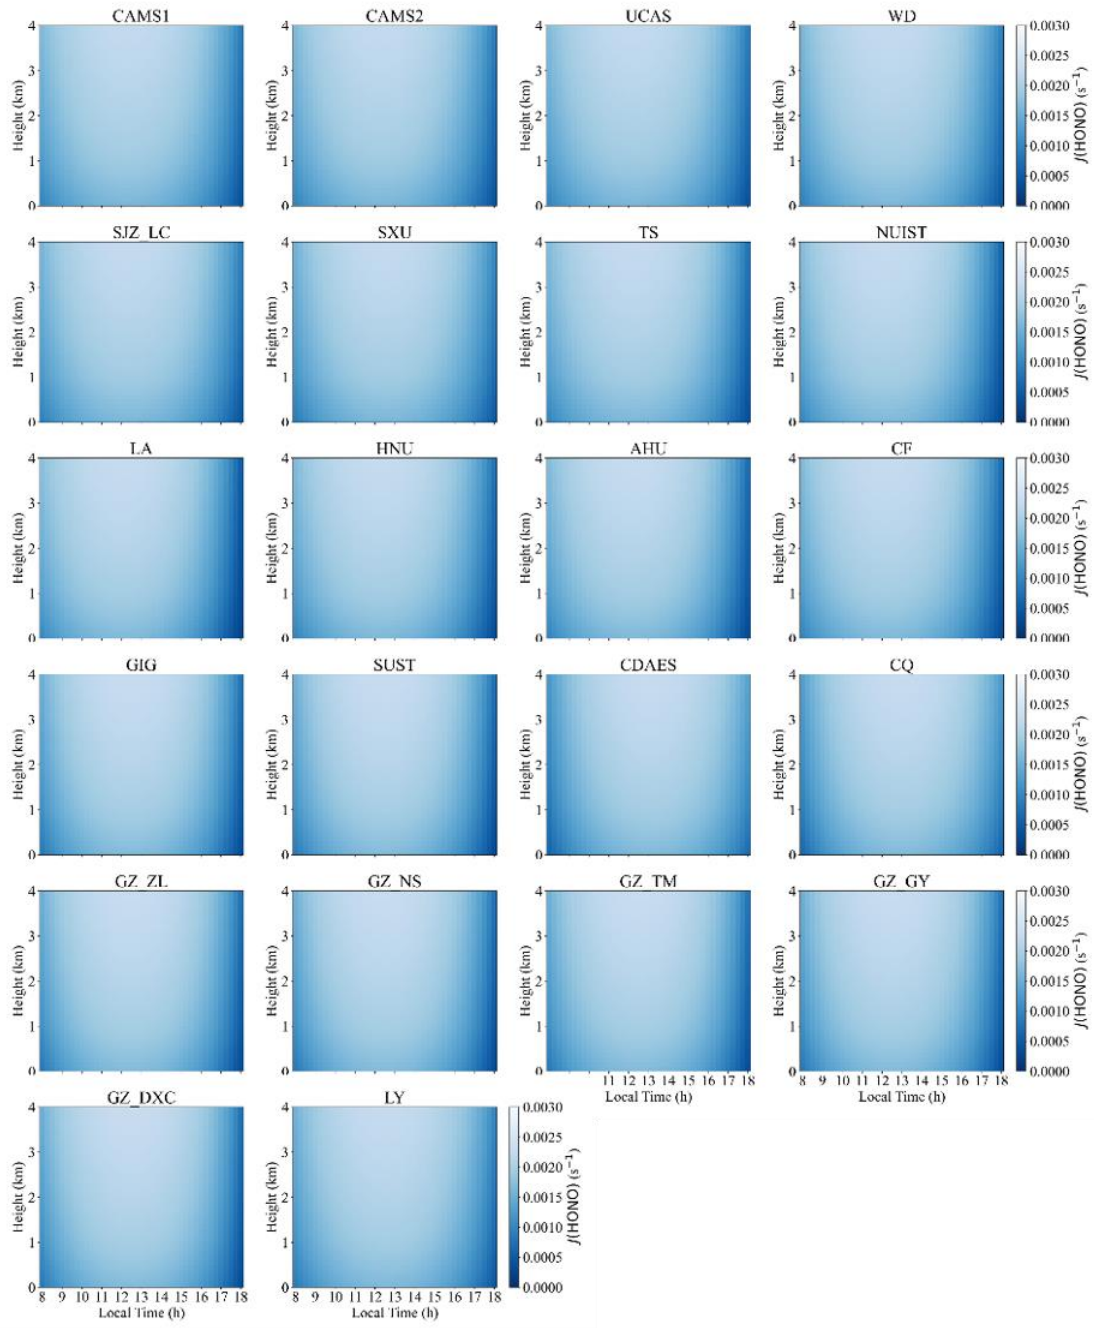

Figure S18. Summer-mean diurnal vertical profiles of the HONO photolysis frequency,  $J(\text{HONO})$ .

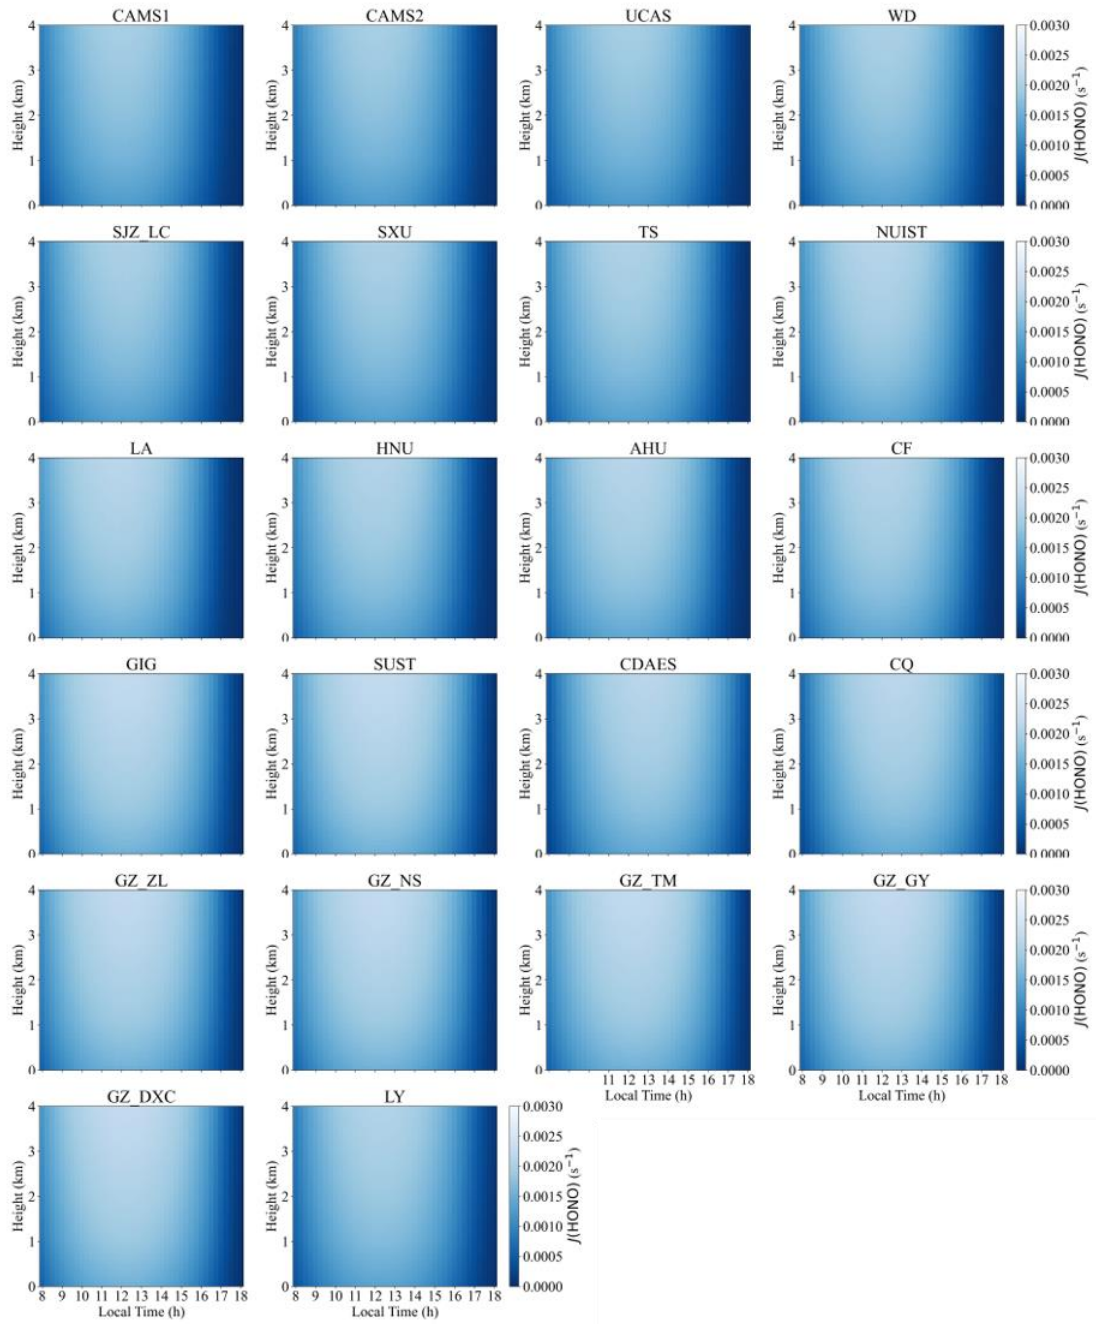

Figure S19. Autumn-mean diurnal vertical profiles of the HONO photolysis frequency,  $J(\text{HONO})$ .

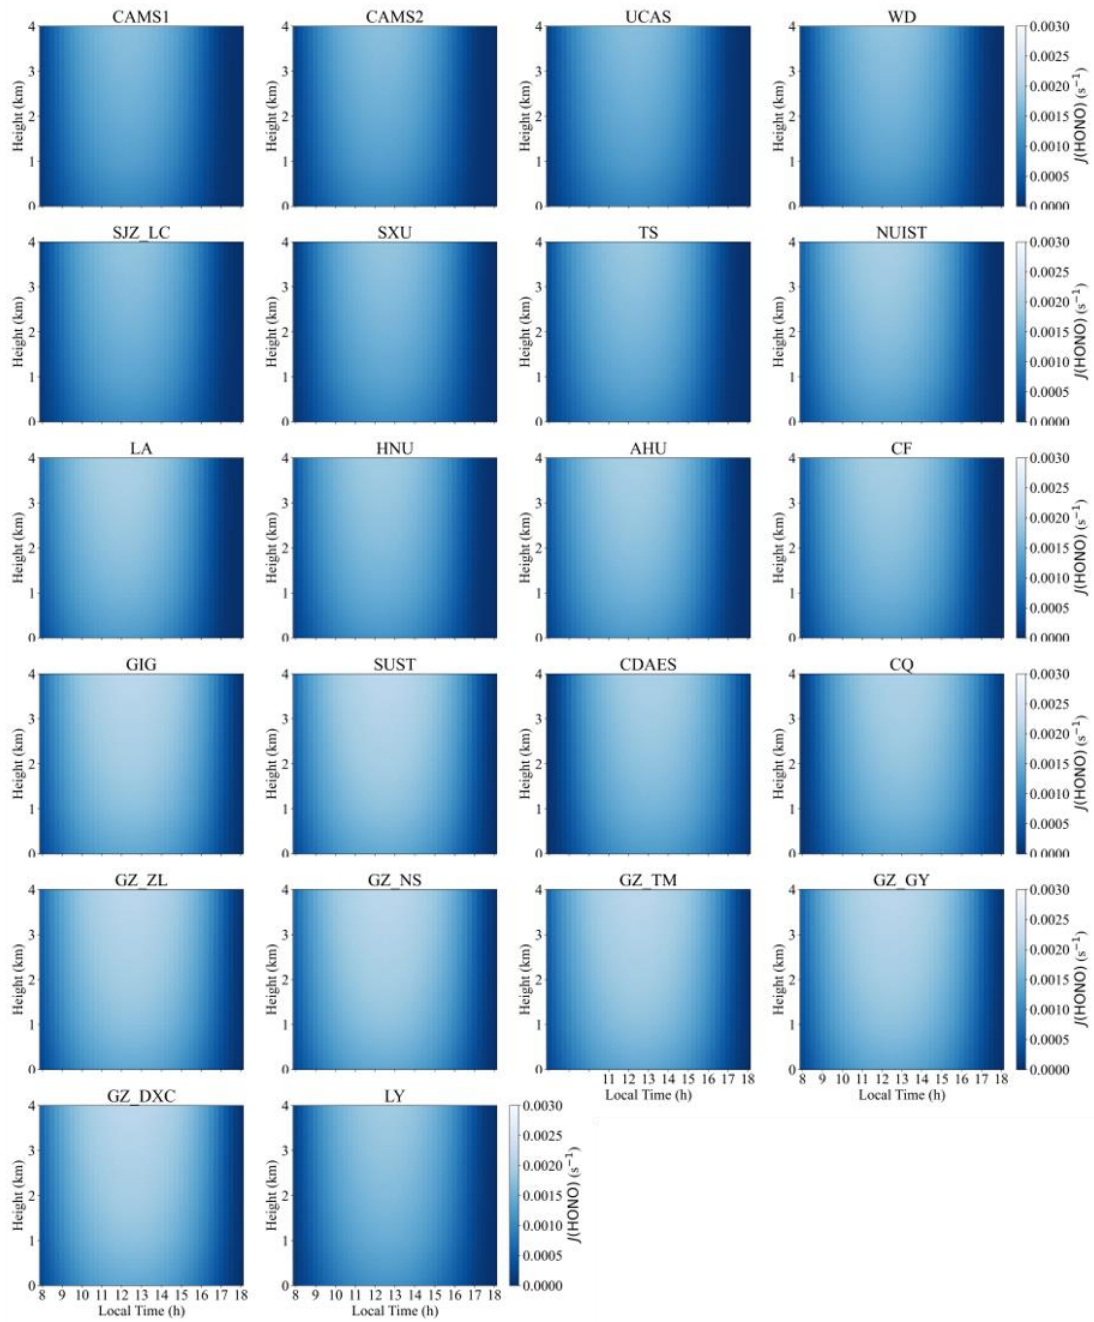

Figure S20. Winter-mean diurnal vertical profiles of the HONO photolysis frequency,  $J(\text{HONO})$ .

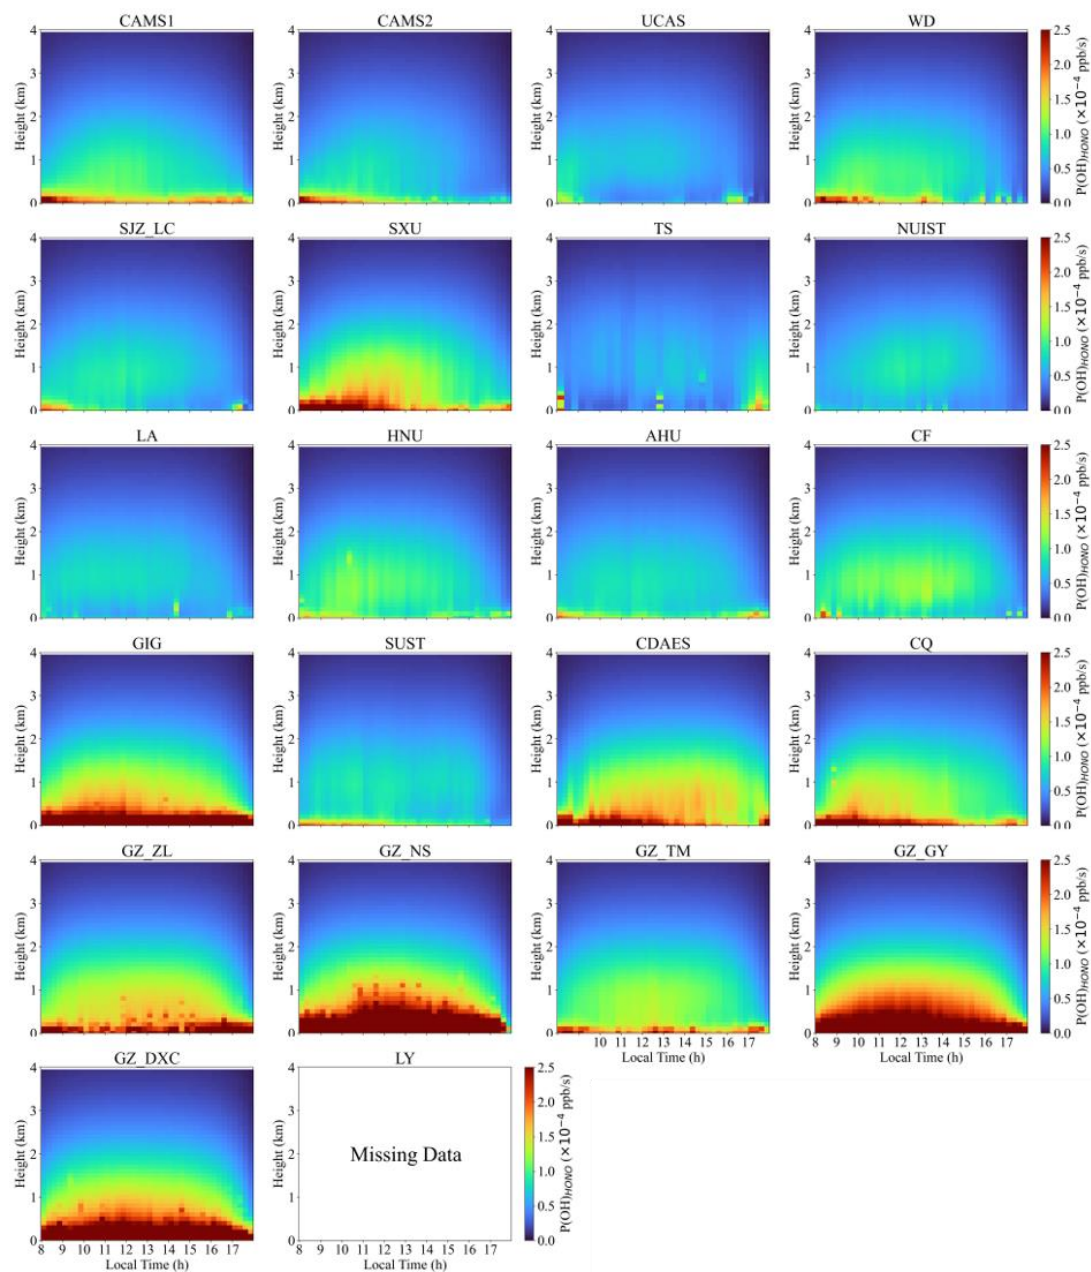

Figure S21. Spring-mean vertical profiles of OH production from HONO photolysis.

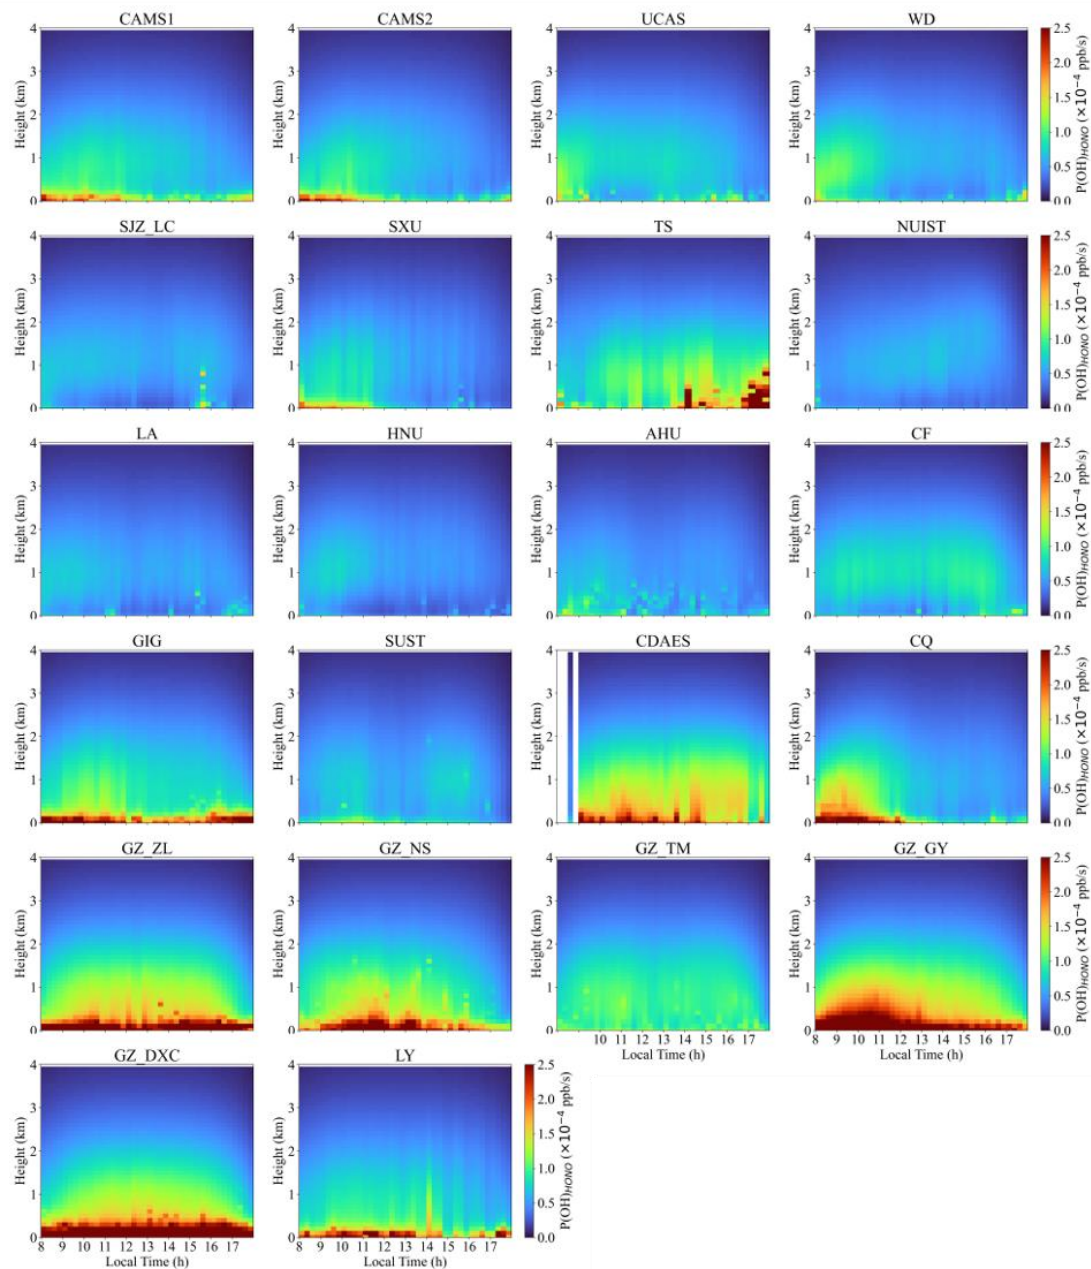

Figure S22. Summer-mean vertical profiles of OH production from HONO photolysis.

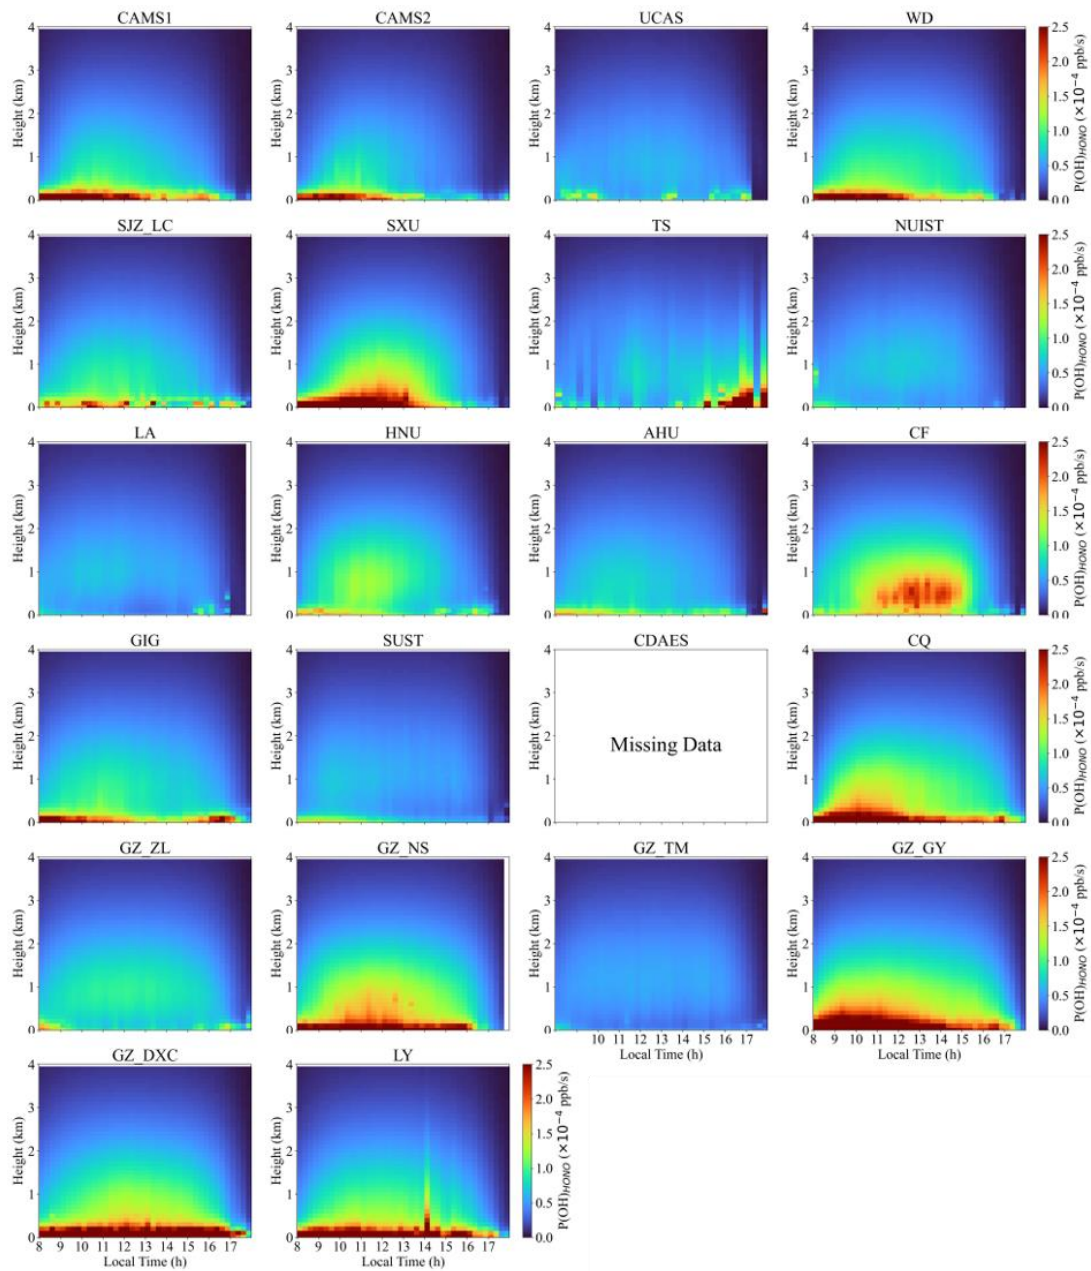

Figure S23. Autumn-mean vertical profiles of OH production from HONO photolysis.

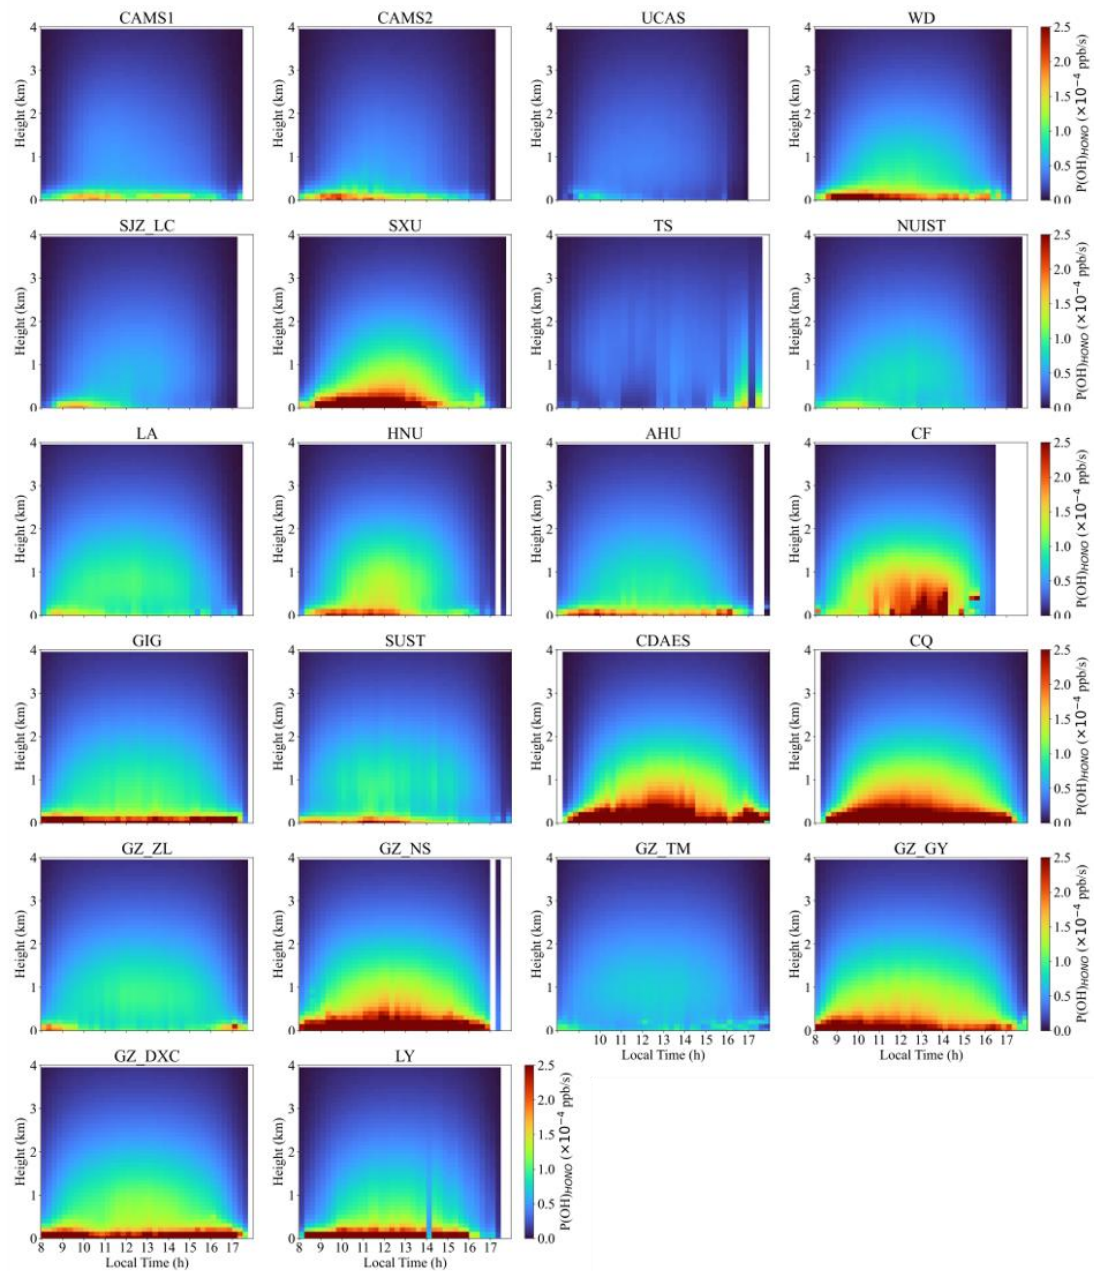

Figure S24. Winter-mean vertical profiles of OH production from HONO photolysis.

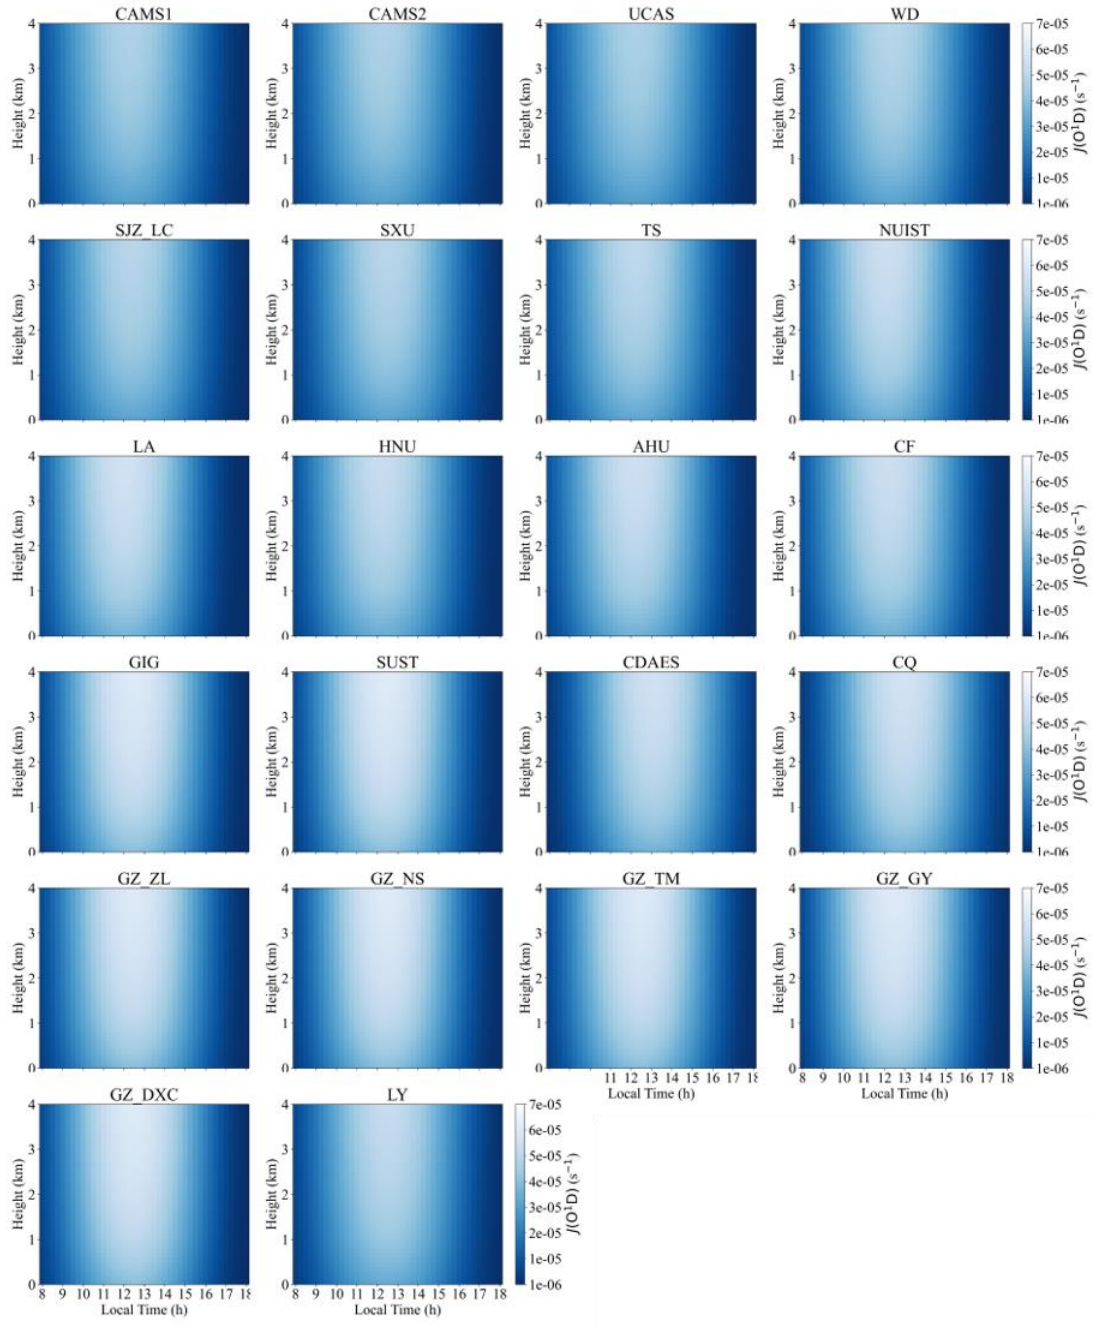

Figure S25. Spring-mean diurnal vertical profiles of the  $O_3$  photolysis frequency,  $J(O(^1D))$ .

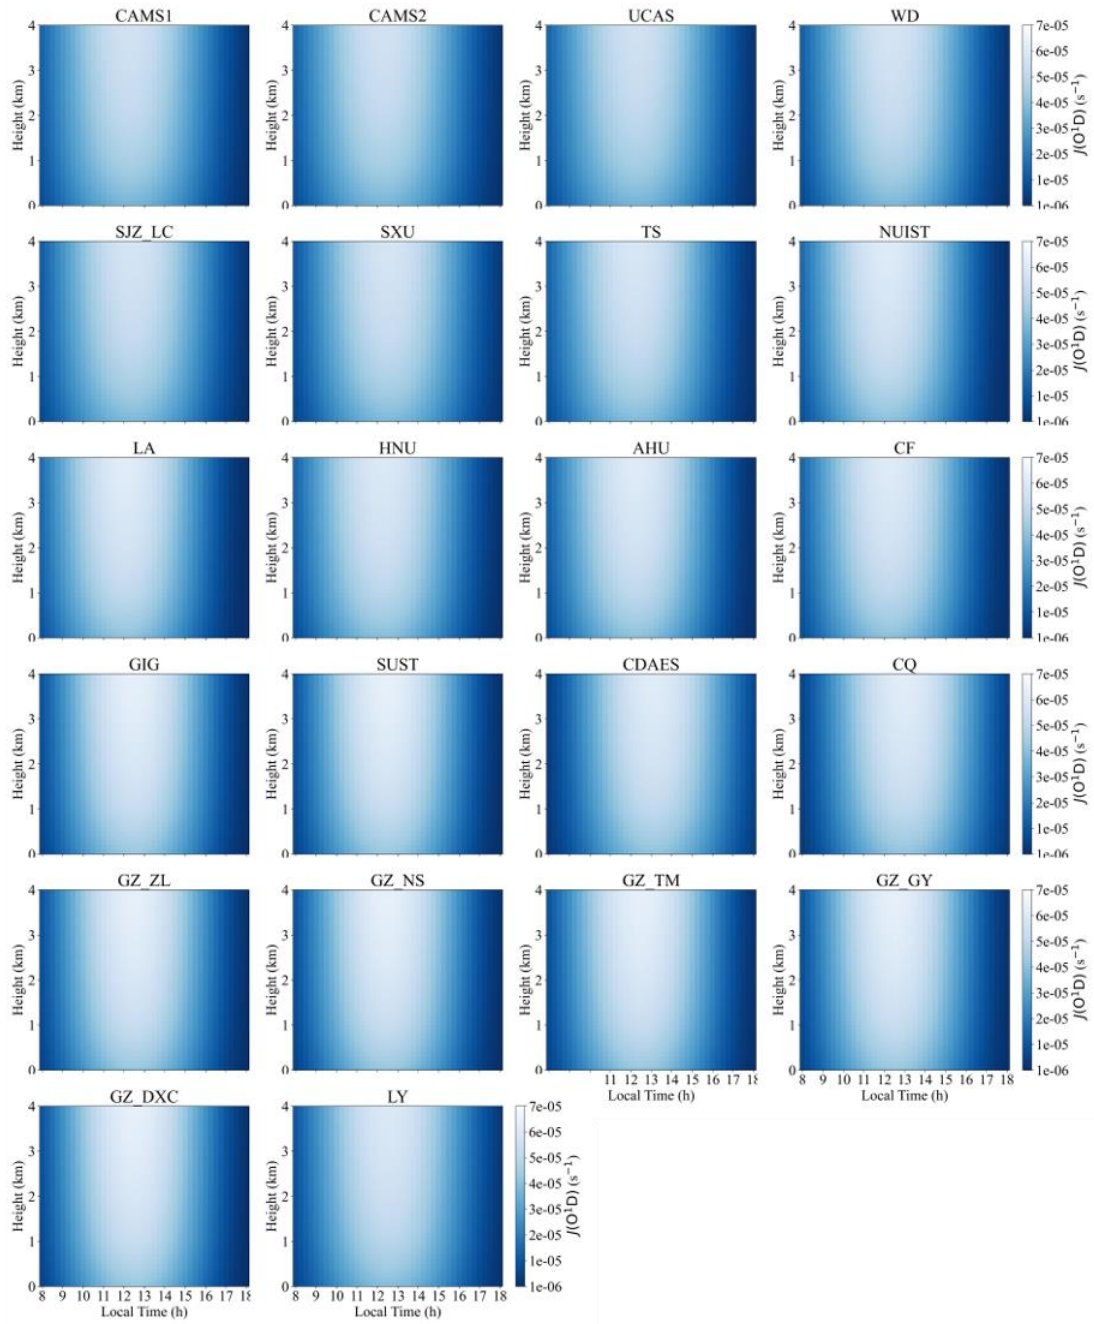

Figure S26. Summer-mean diurnal vertical profiles of the  $O_3$  photolysis frequency,  $J(O(^1D))$ .

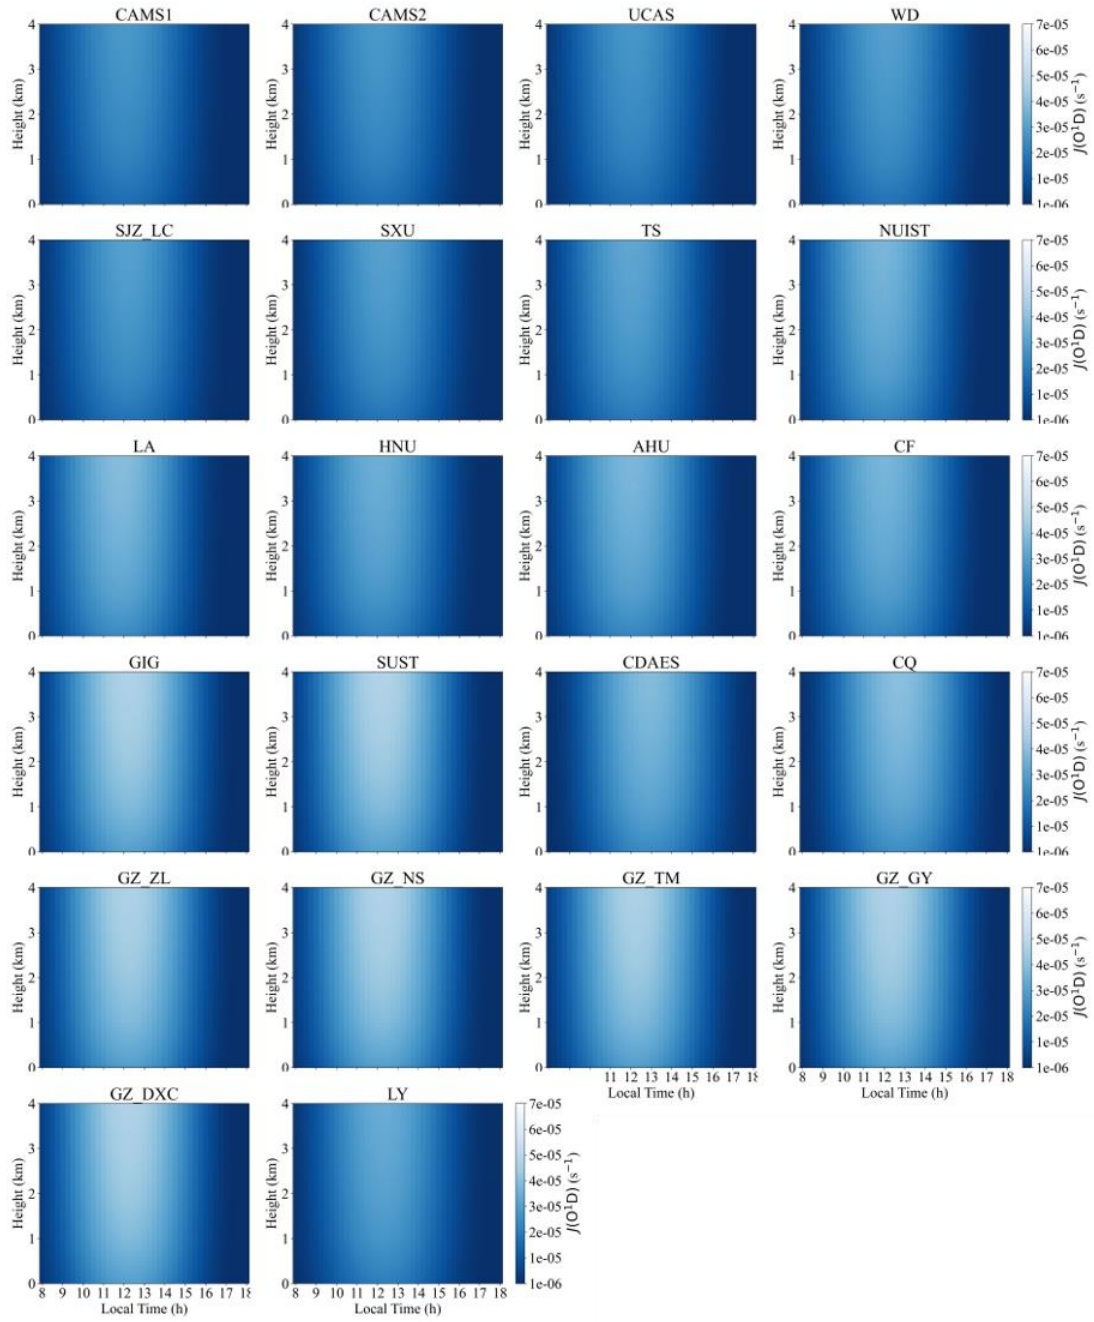

Figure S27. Autumn-mean diurnal vertical profiles of the  $O_3$  photolysis frequency,  $J(O(^1D))$ .

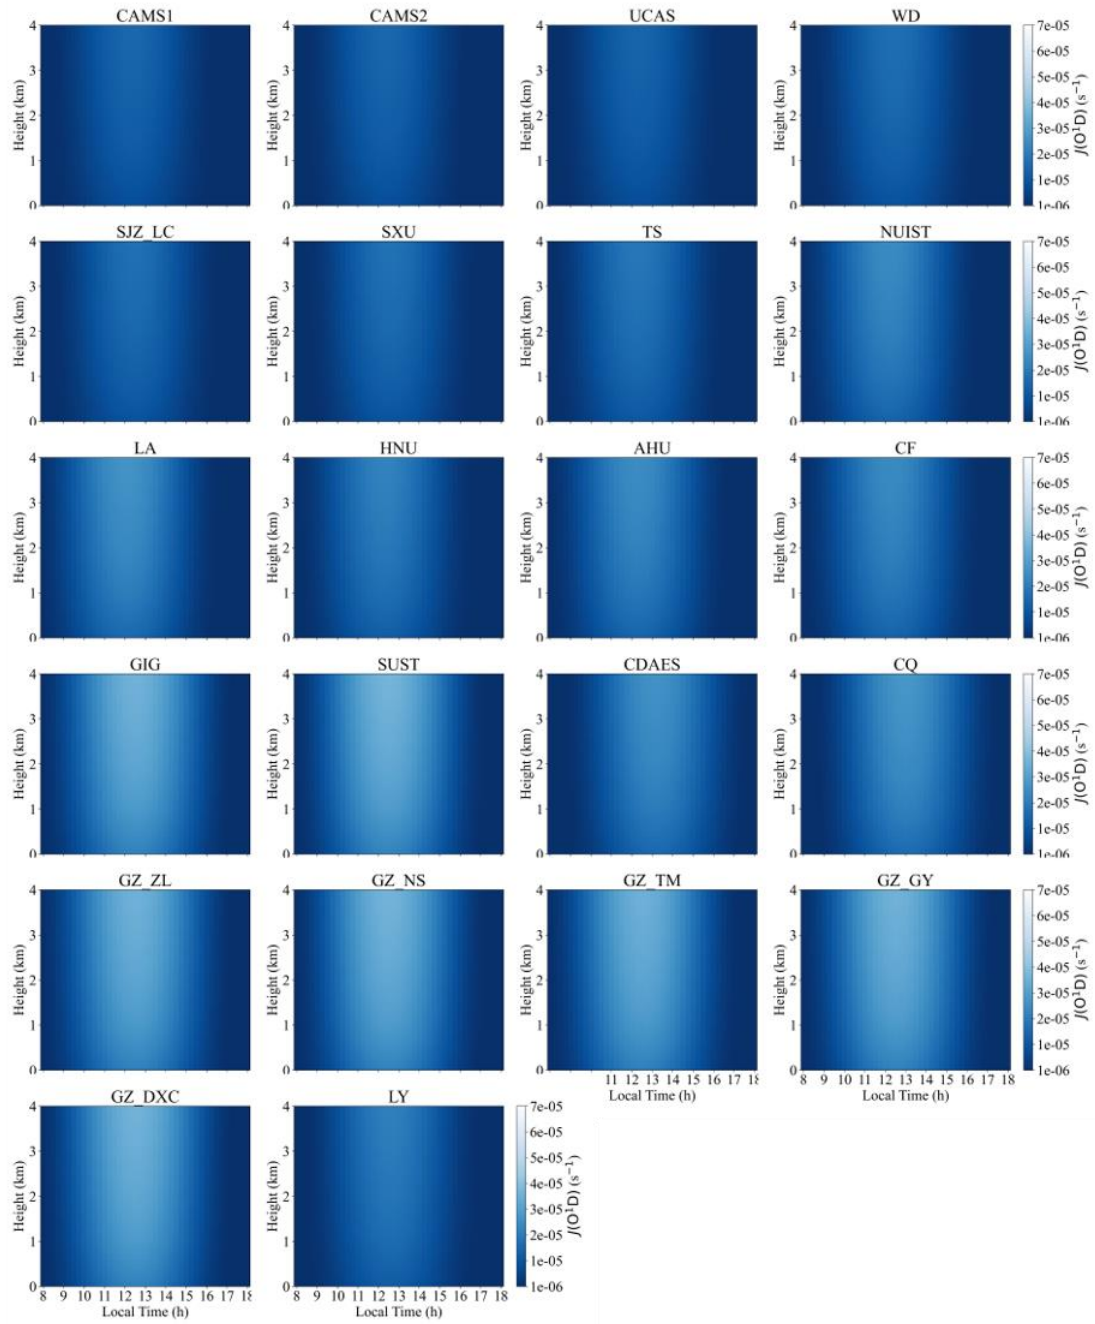

Figure S28. Winter-mean diurnal vertical profiles of the  $O_3$  photolysis frequency,  $J(O(^1D))$ .

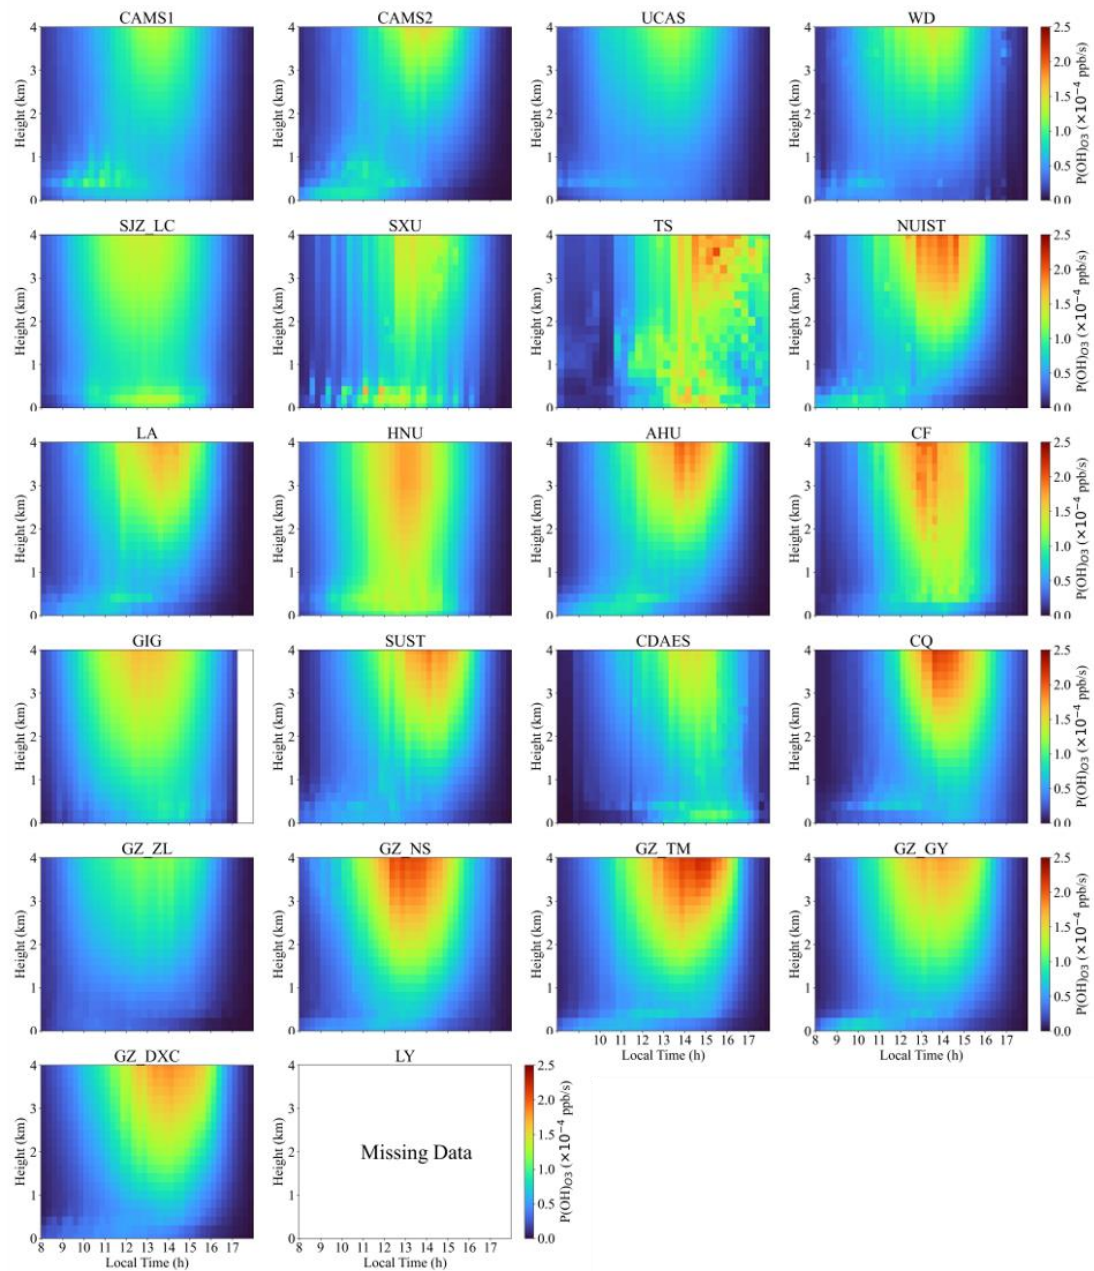

Figure S29. Spring-mean vertical profiles of OH production from O<sub>3</sub> photolysis.

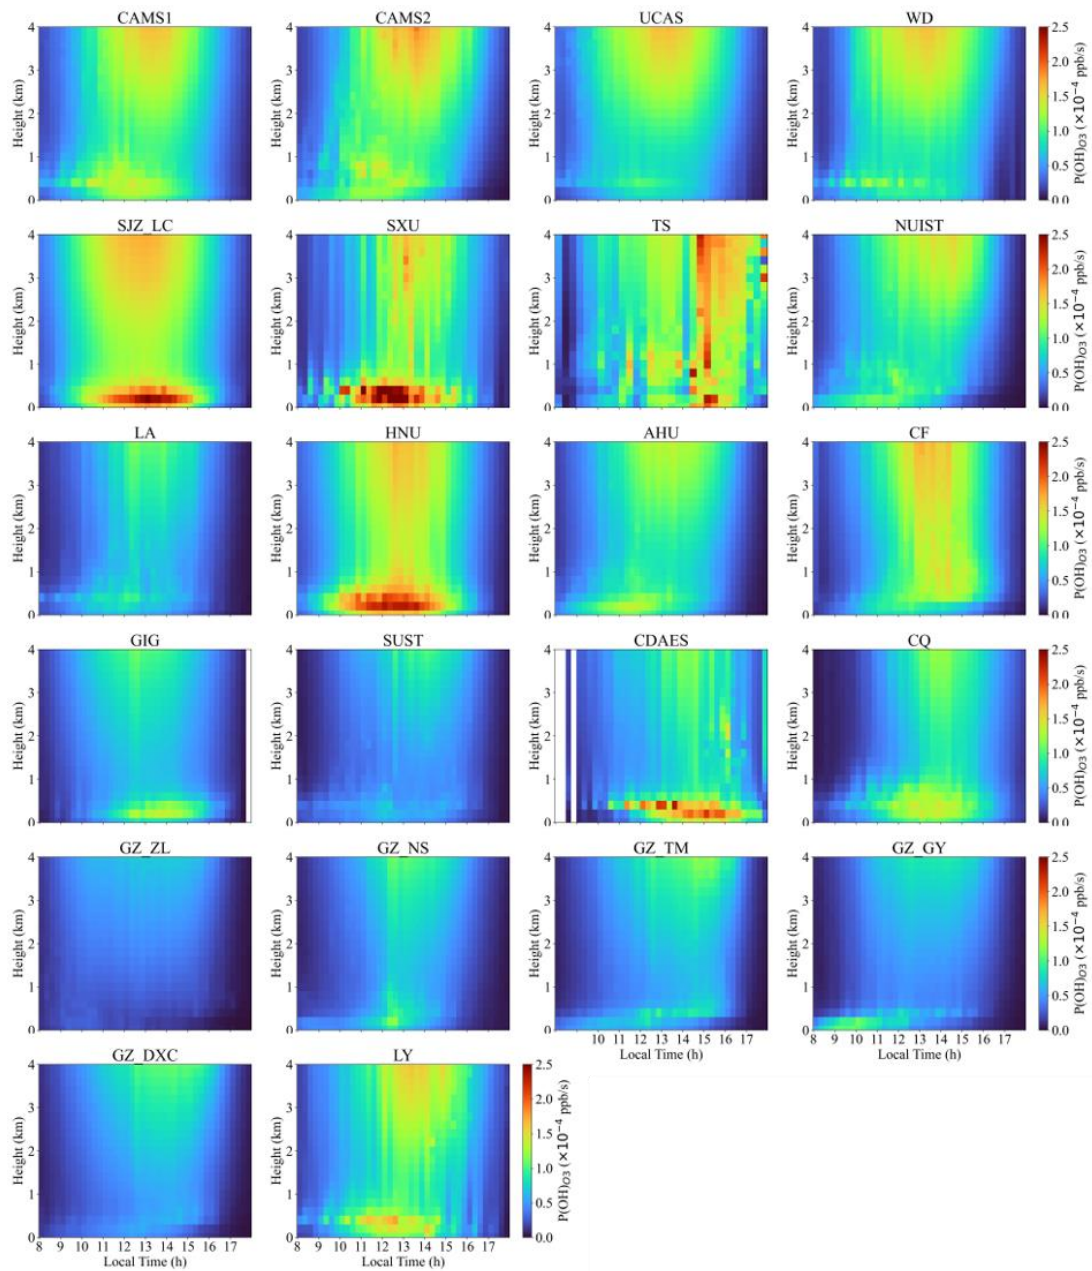

Figure S30. Summer-mean vertical profiles of OH production from O<sub>3</sub> photolysis.

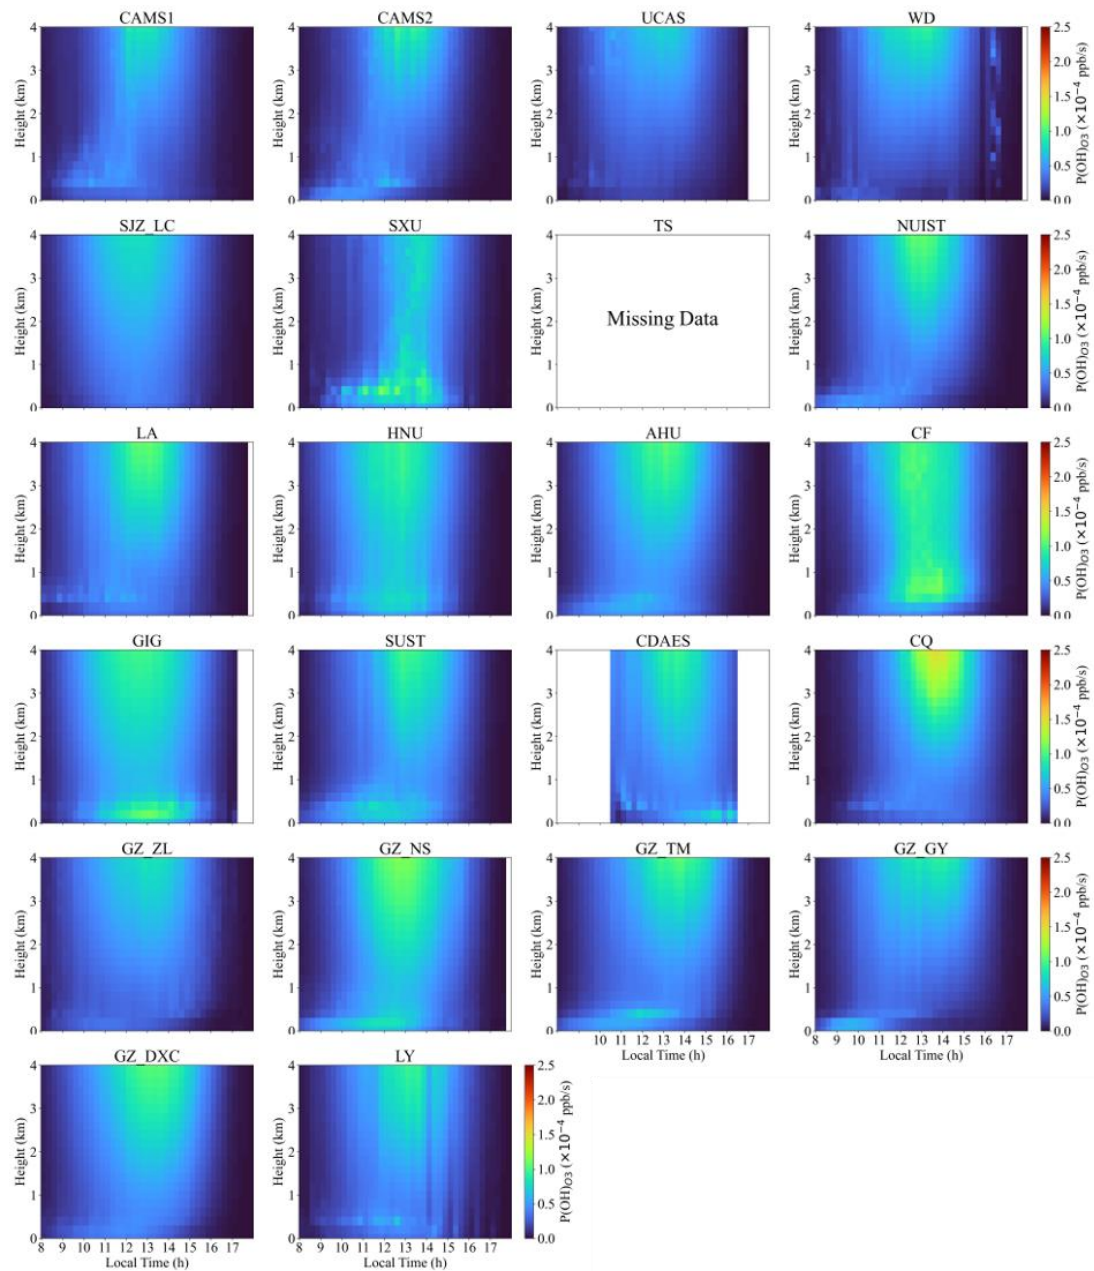

Figure S31. Autumn-mean vertical profiles of OH production from O<sub>3</sub> photolysis.

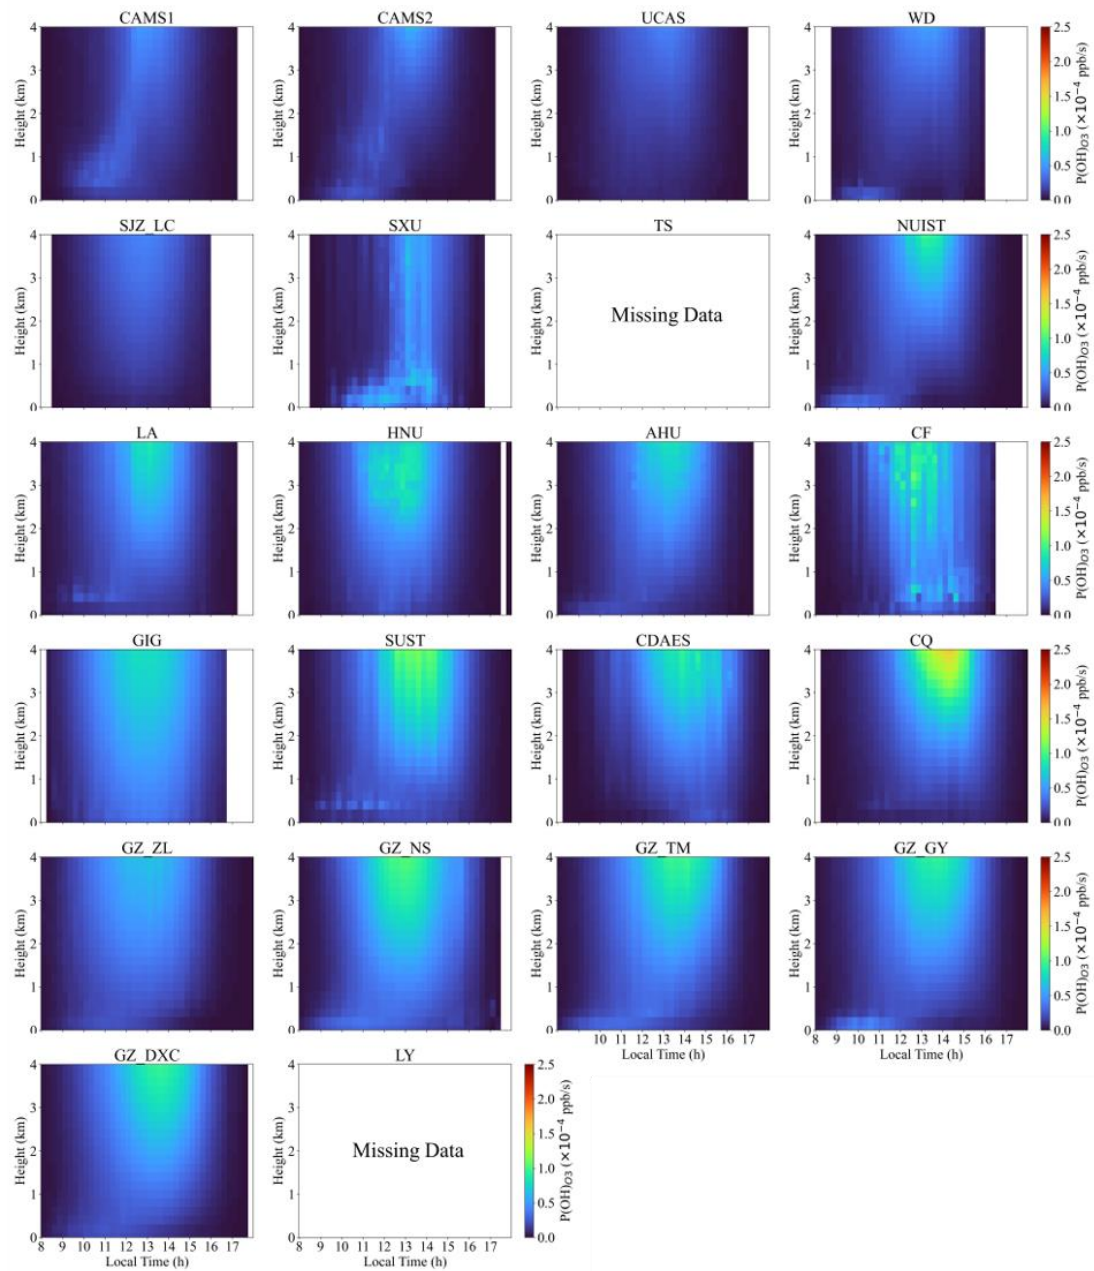

Figure S32. Winter-mean vertical profiles of OH production from O<sub>3</sub> photolysis.
